# Supplementary material
Source: publisher figshare collection journal article supplement (https://sage.figshare.com/ndownloader/files/18725162)
Supplement: Supplementary file 1 [file 18725162]

## **DISCLAIMER:**

**LIMITED LONGER TERM RESULTS ARE AVAILABLE FOR THIS PROCEDURE.**

**ANY USE OF THE TECHNIQUE IS AT THE DISCRETION OF THE TREATING SURGEON.**

**THE LACK OF WIDE SPREAD EXPERIENCE MUST BE CONSIDERED IN ANY DECISION TO USE THE PROCEDURE - AND SUCH DETAILS SHOULD BE DISCLOSED TO THE PATIENT.**

# **ANAFAB Procedure for Scapho-lunate dissociation**

**Assoc. Prof. Michael Sandow FRACS  
Wakefield Orthopaedic Clinic  
University of Adelaide**

**June 2019**

# Scapho-lunate dissociation

A 3D anatomical model of a human wrist joint, rendered in a light beige color. The model is shown from a dorsal perspective, with the scaphoid and lunate bones clearly visible. A significant gap (diastasis) is present between the scaphoid and lunate bones, indicating a dissociation. The surrounding carpal bones and the distal radius and ulna are also visible. The model is positioned against a white background.

**Characterized by:**

**Scapho-lunate diastasis**

**Dorsal scaphoid subluxation**

**Scaphoid flexion**

**Lunate extension**

**Volar**

**Dorsal**

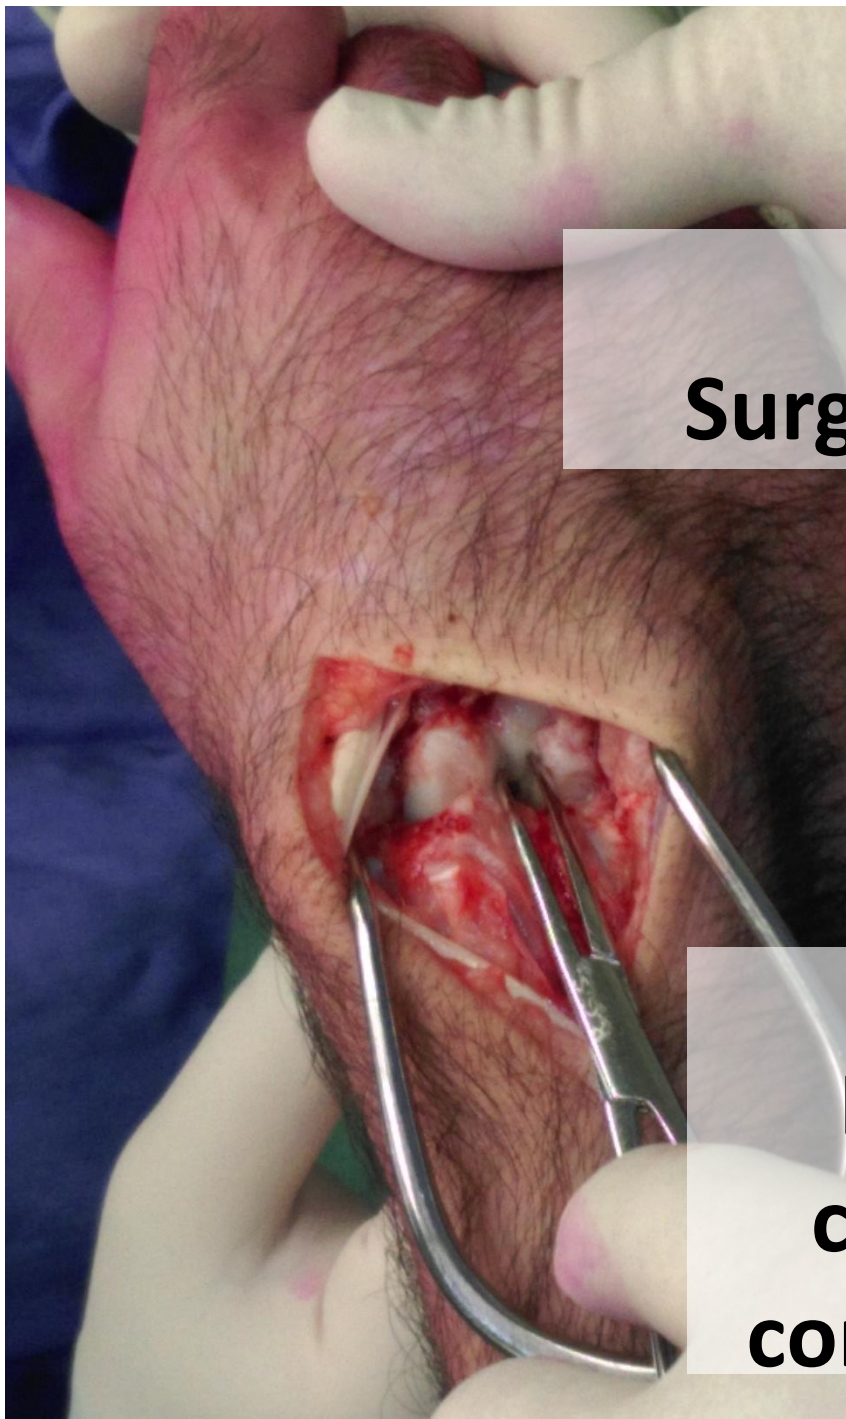

# **ANAFAB Surgical Technique**

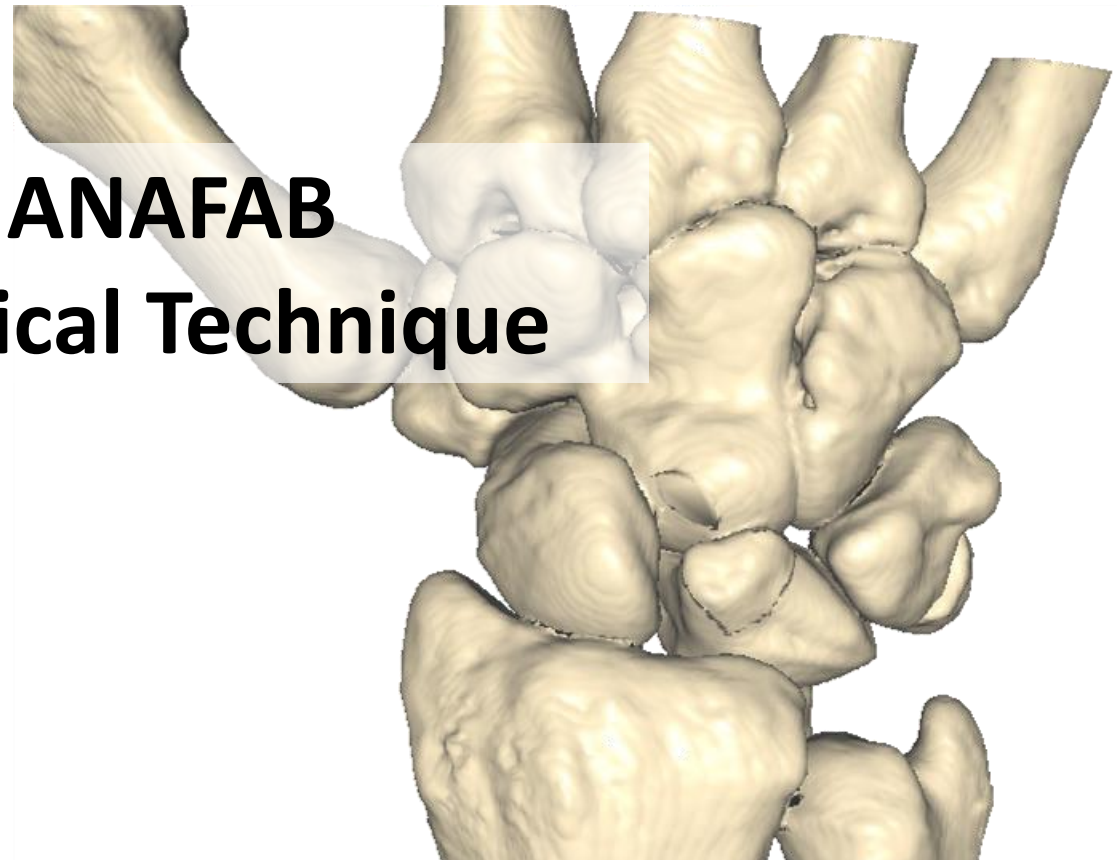

**Dorsal  
Longitudinal incision through 3<sup>rd</sup>  
compartment, EPL left out and 4<sup>th</sup>  
compartment elevated but left intact**





**Dorsal**

**Dorsal Scapho-lunate ligament attachments identified  
- marked with 2.5mm drill**

**Volar**

**Longitudinal incision along line of FCR  
and through sheath to volar capsule and radius**

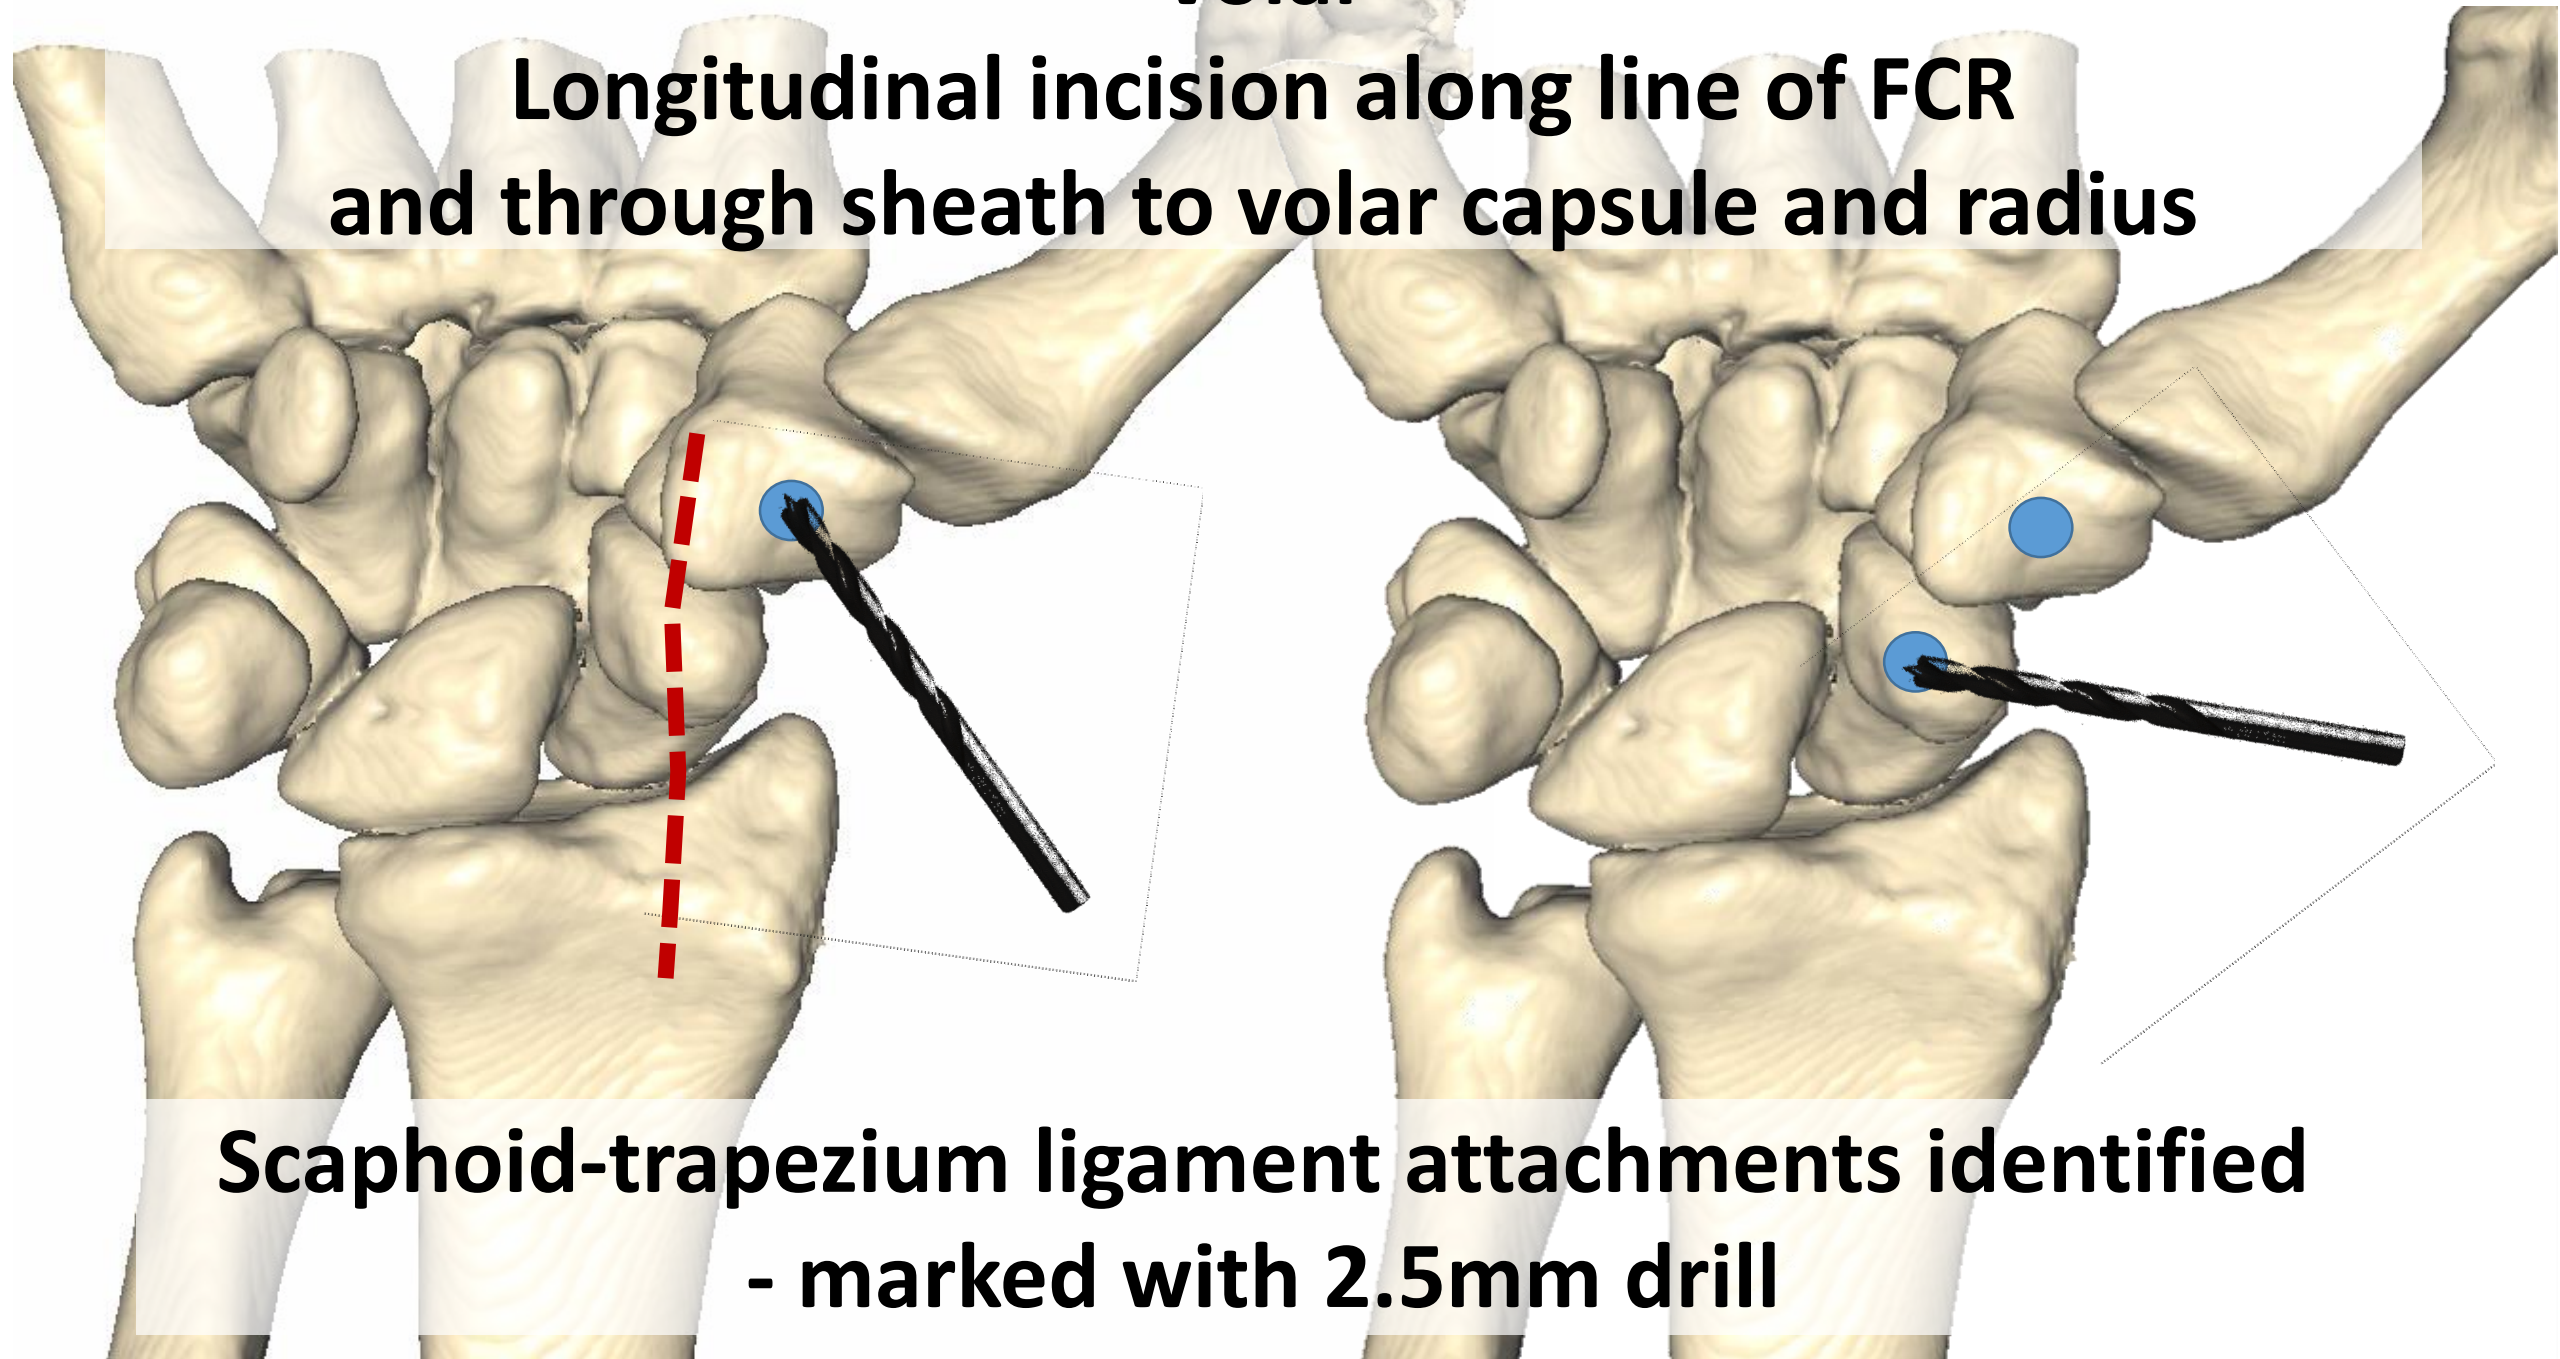

**Scaphoid-trapezium ligament attachments identified  
- marked with 2.5mm drill**



**K-wire inserted along scaphoid axis using  
targeting jig or Imaging**

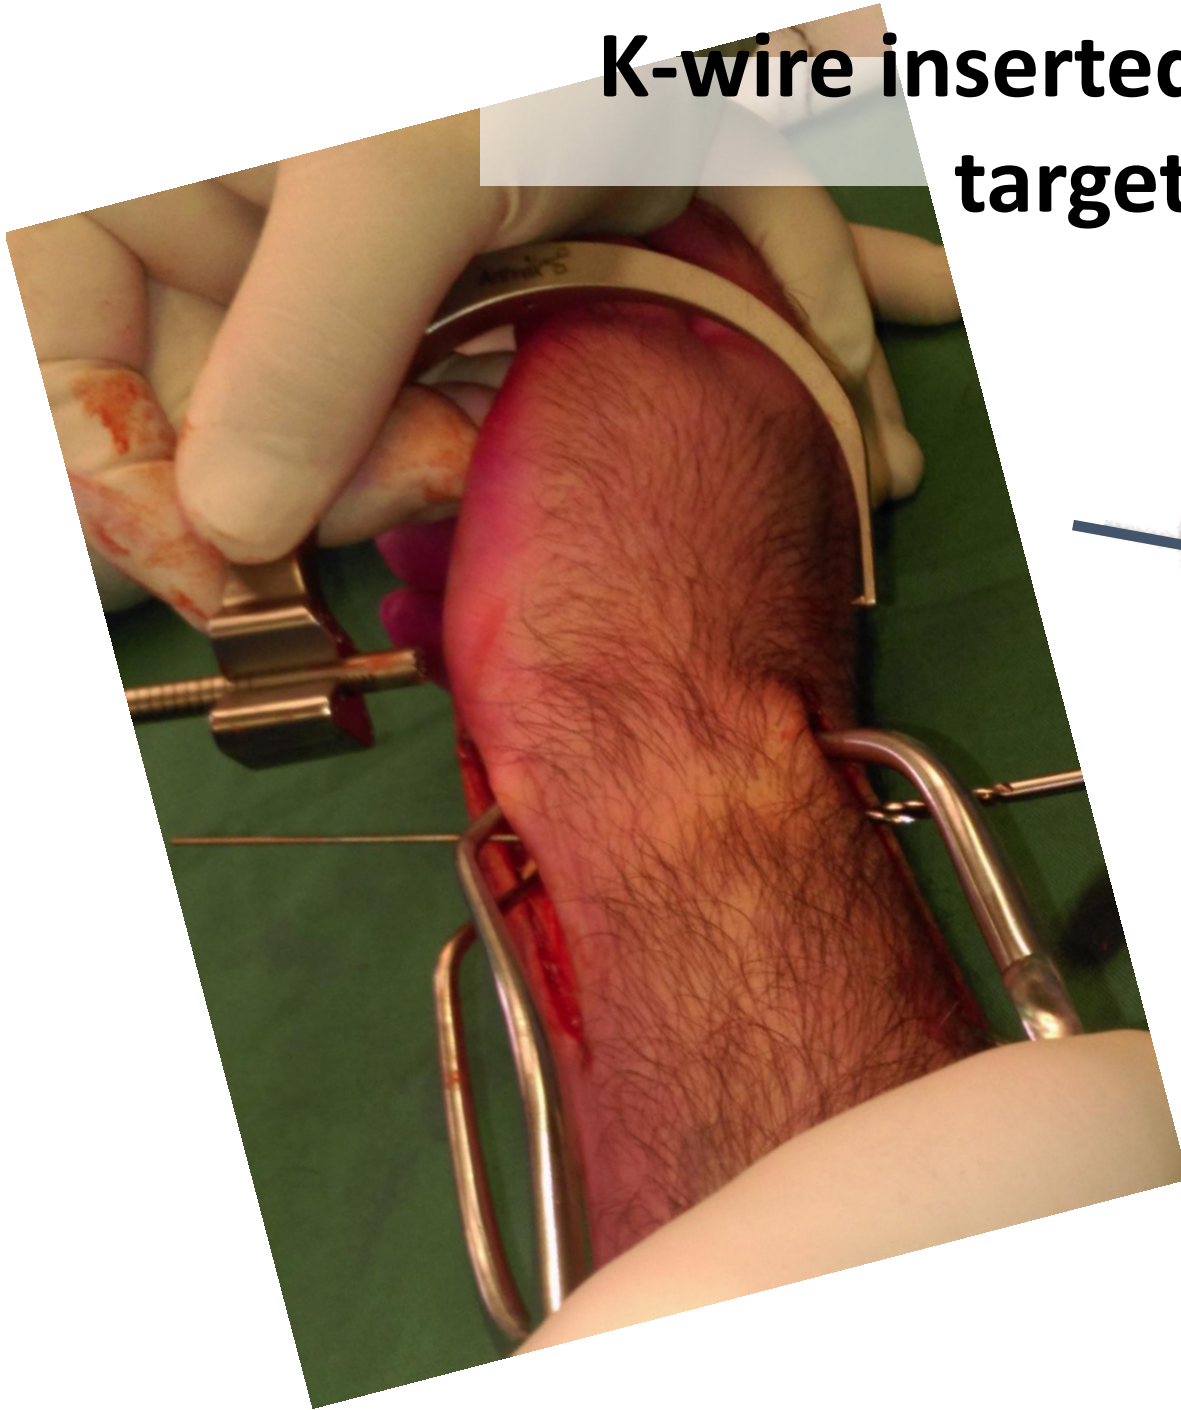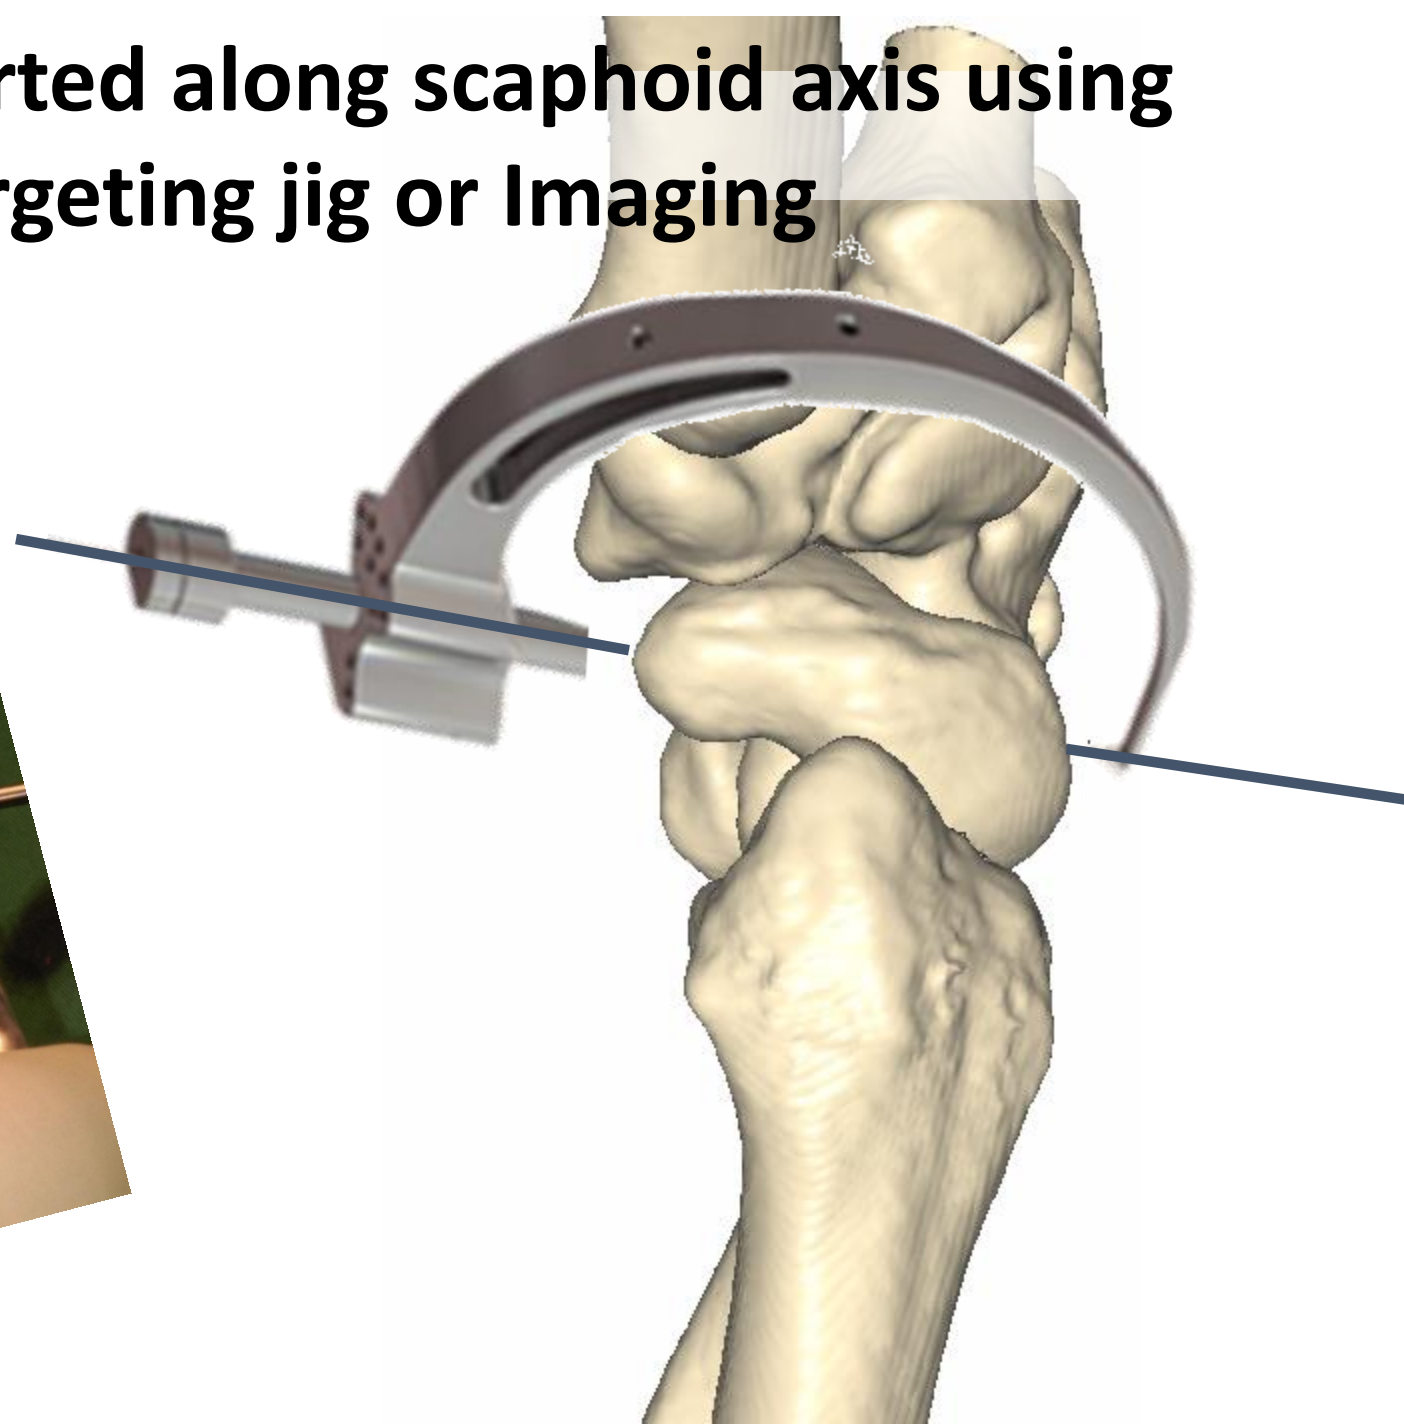

**3mm cannulated drill over k-wire to create scaphoid tunnel.**  
**Drill dorsal to volar to ensure the proximal**  
**scaphoid drill hole is correctly positioned**

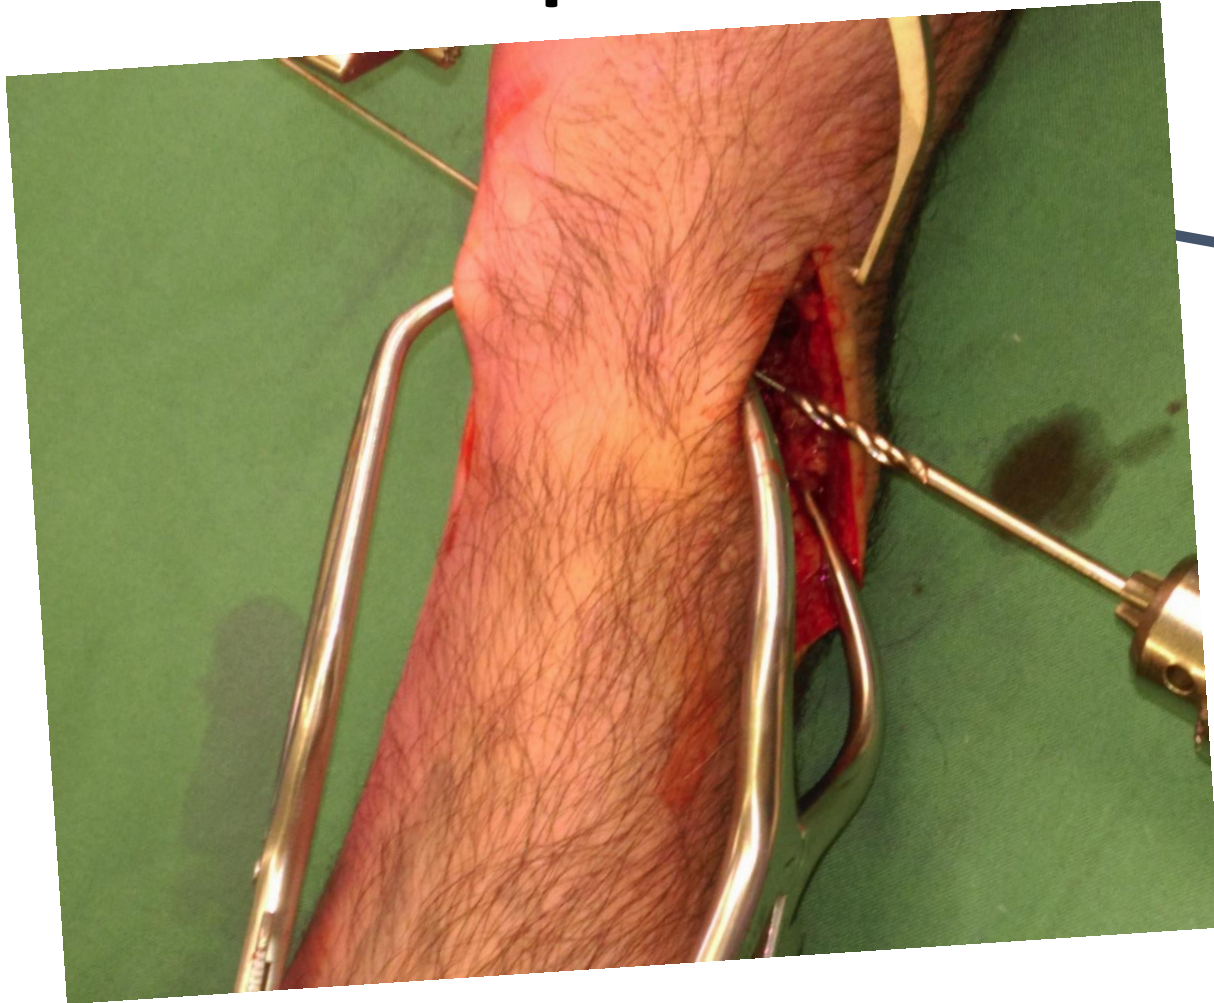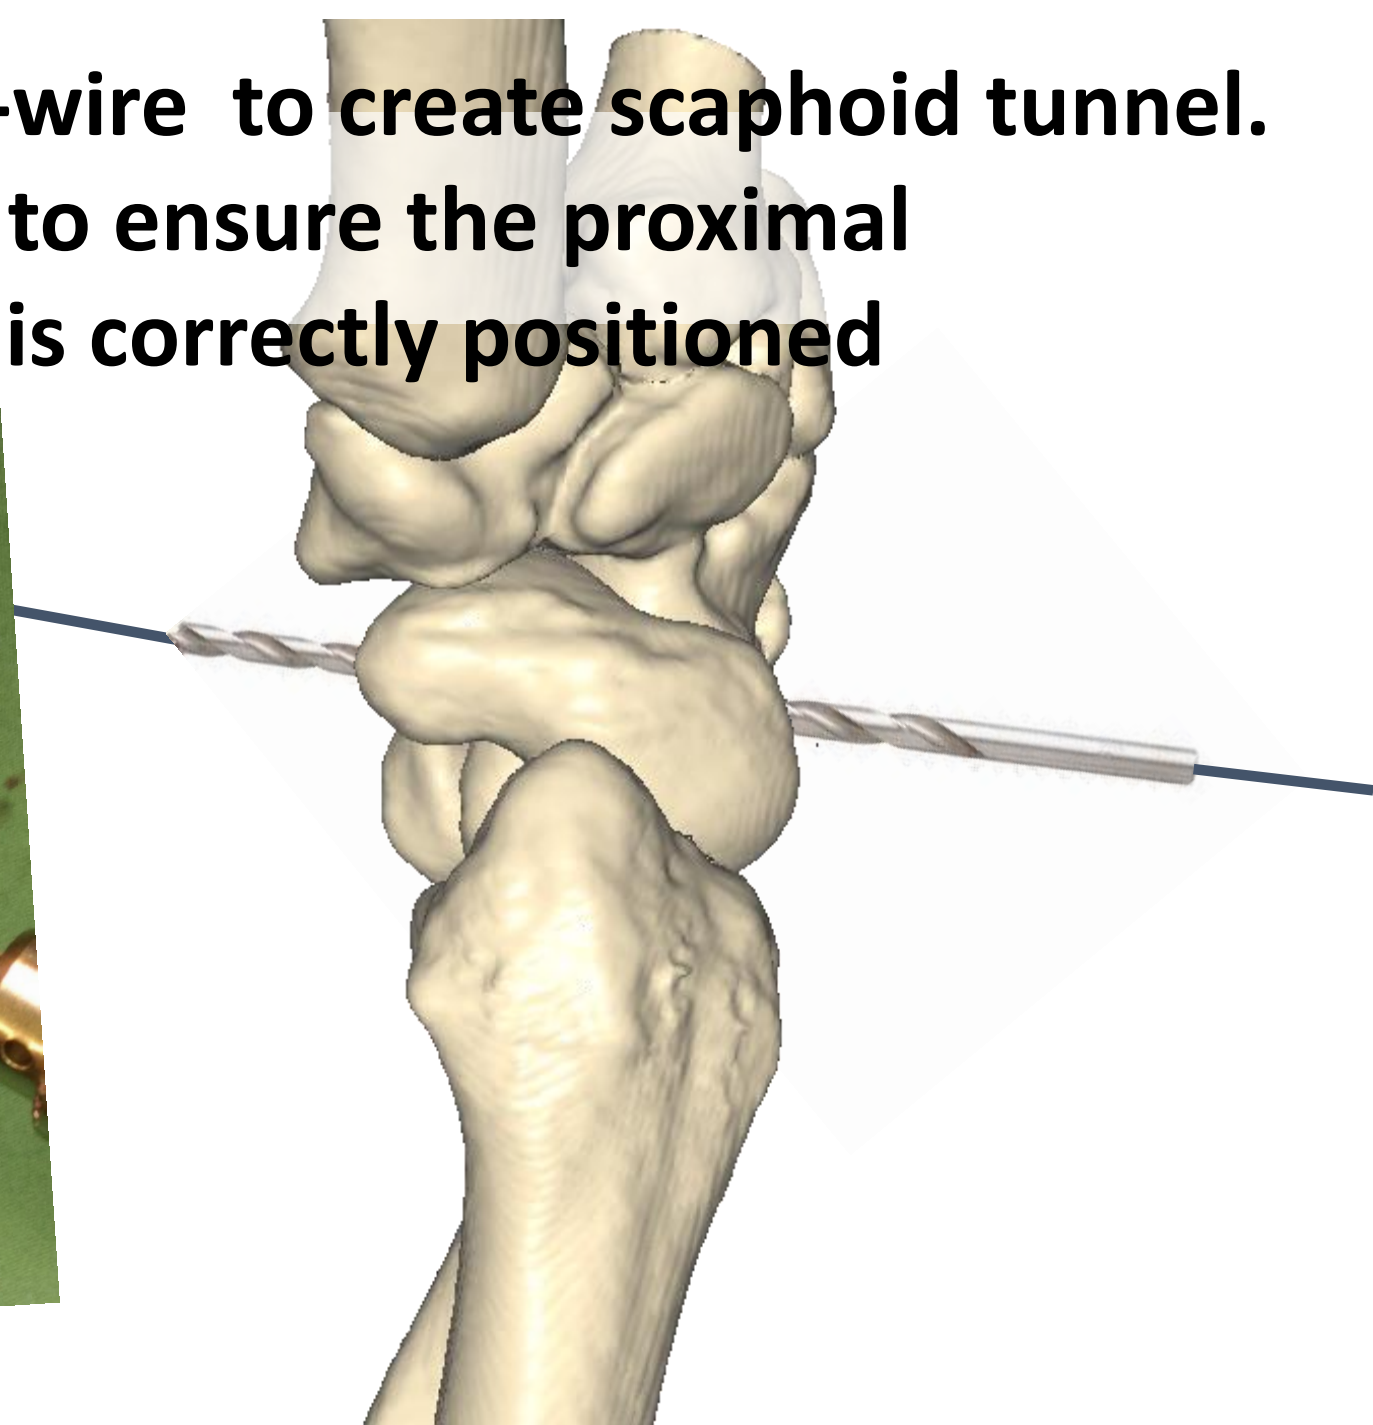



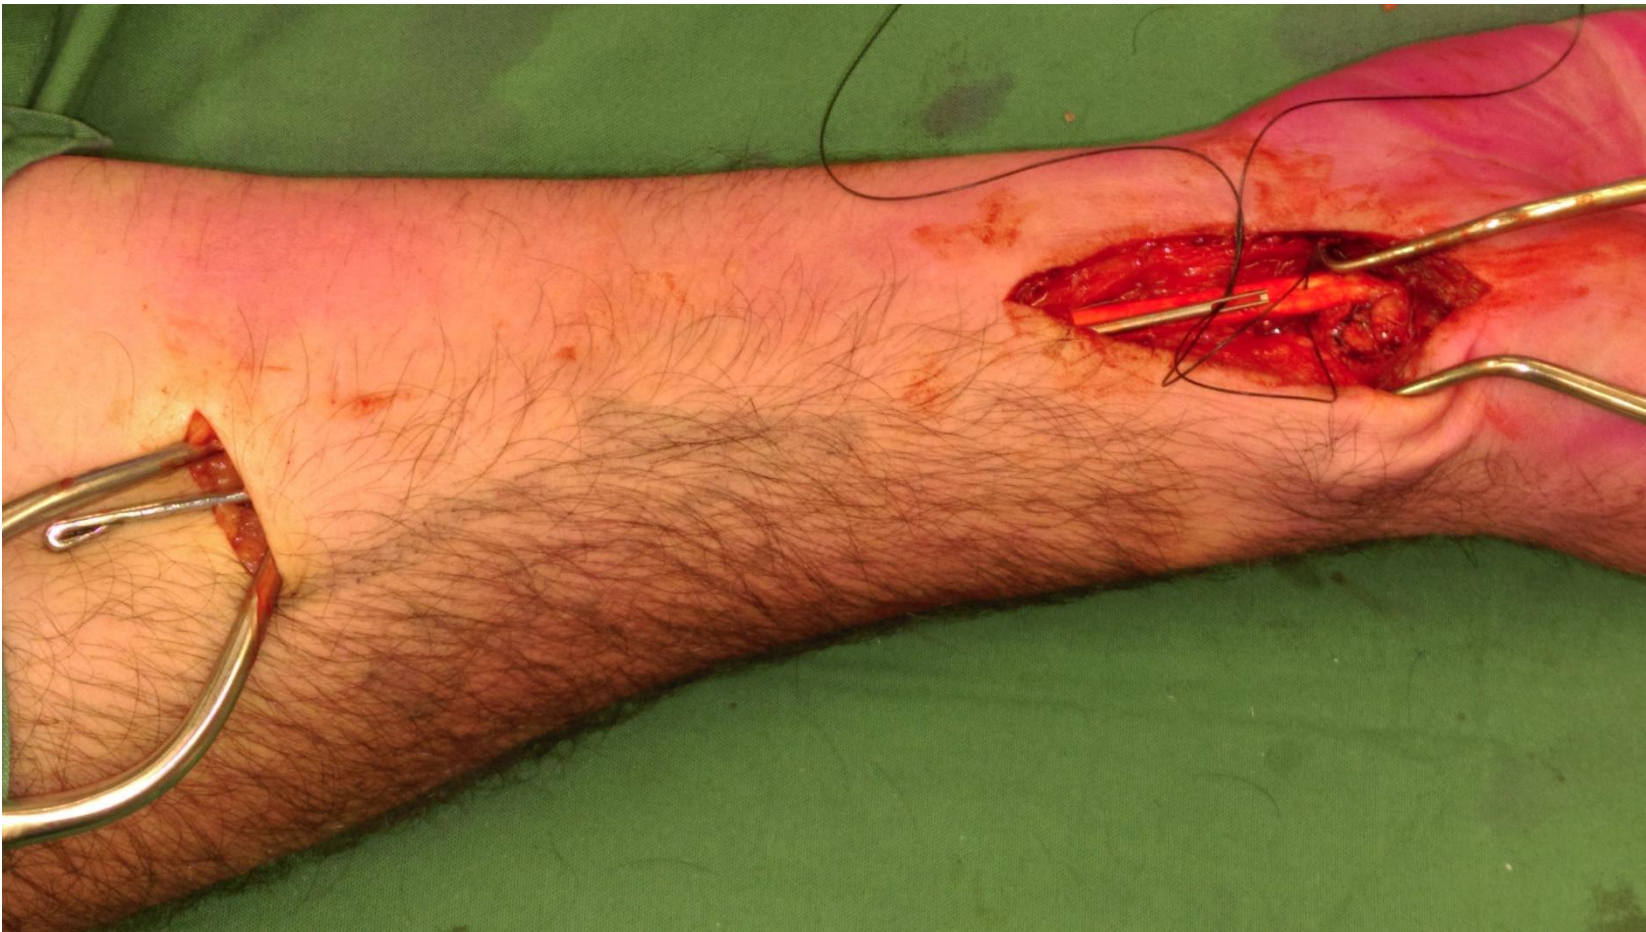

**2.5mm wide 15cm long distally based strip of FCR - passing pin, and No.2 Nylon to strip, distal to proximal**

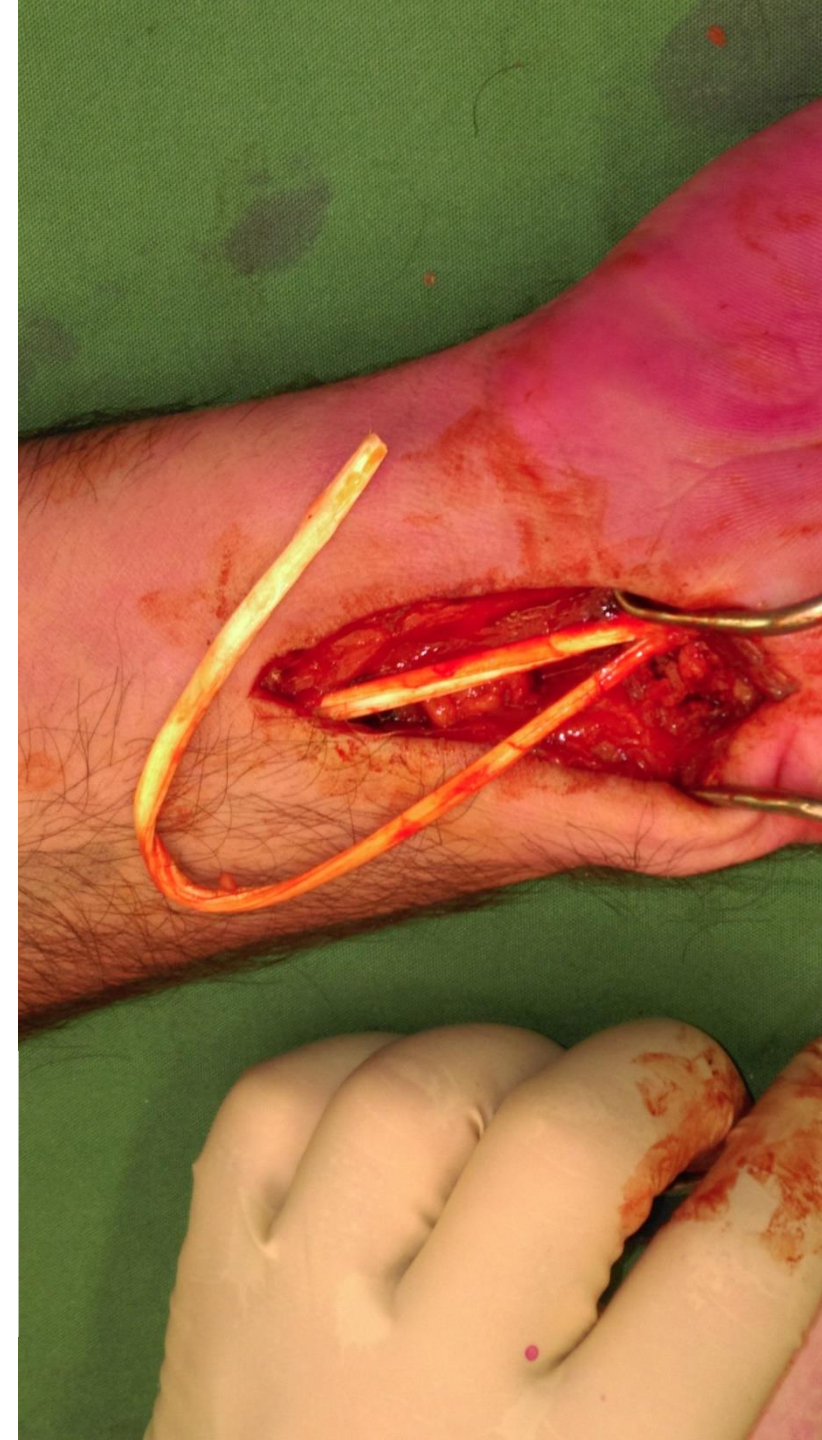



**2.5mm wide 15cm long  
distally based strip of FCR**

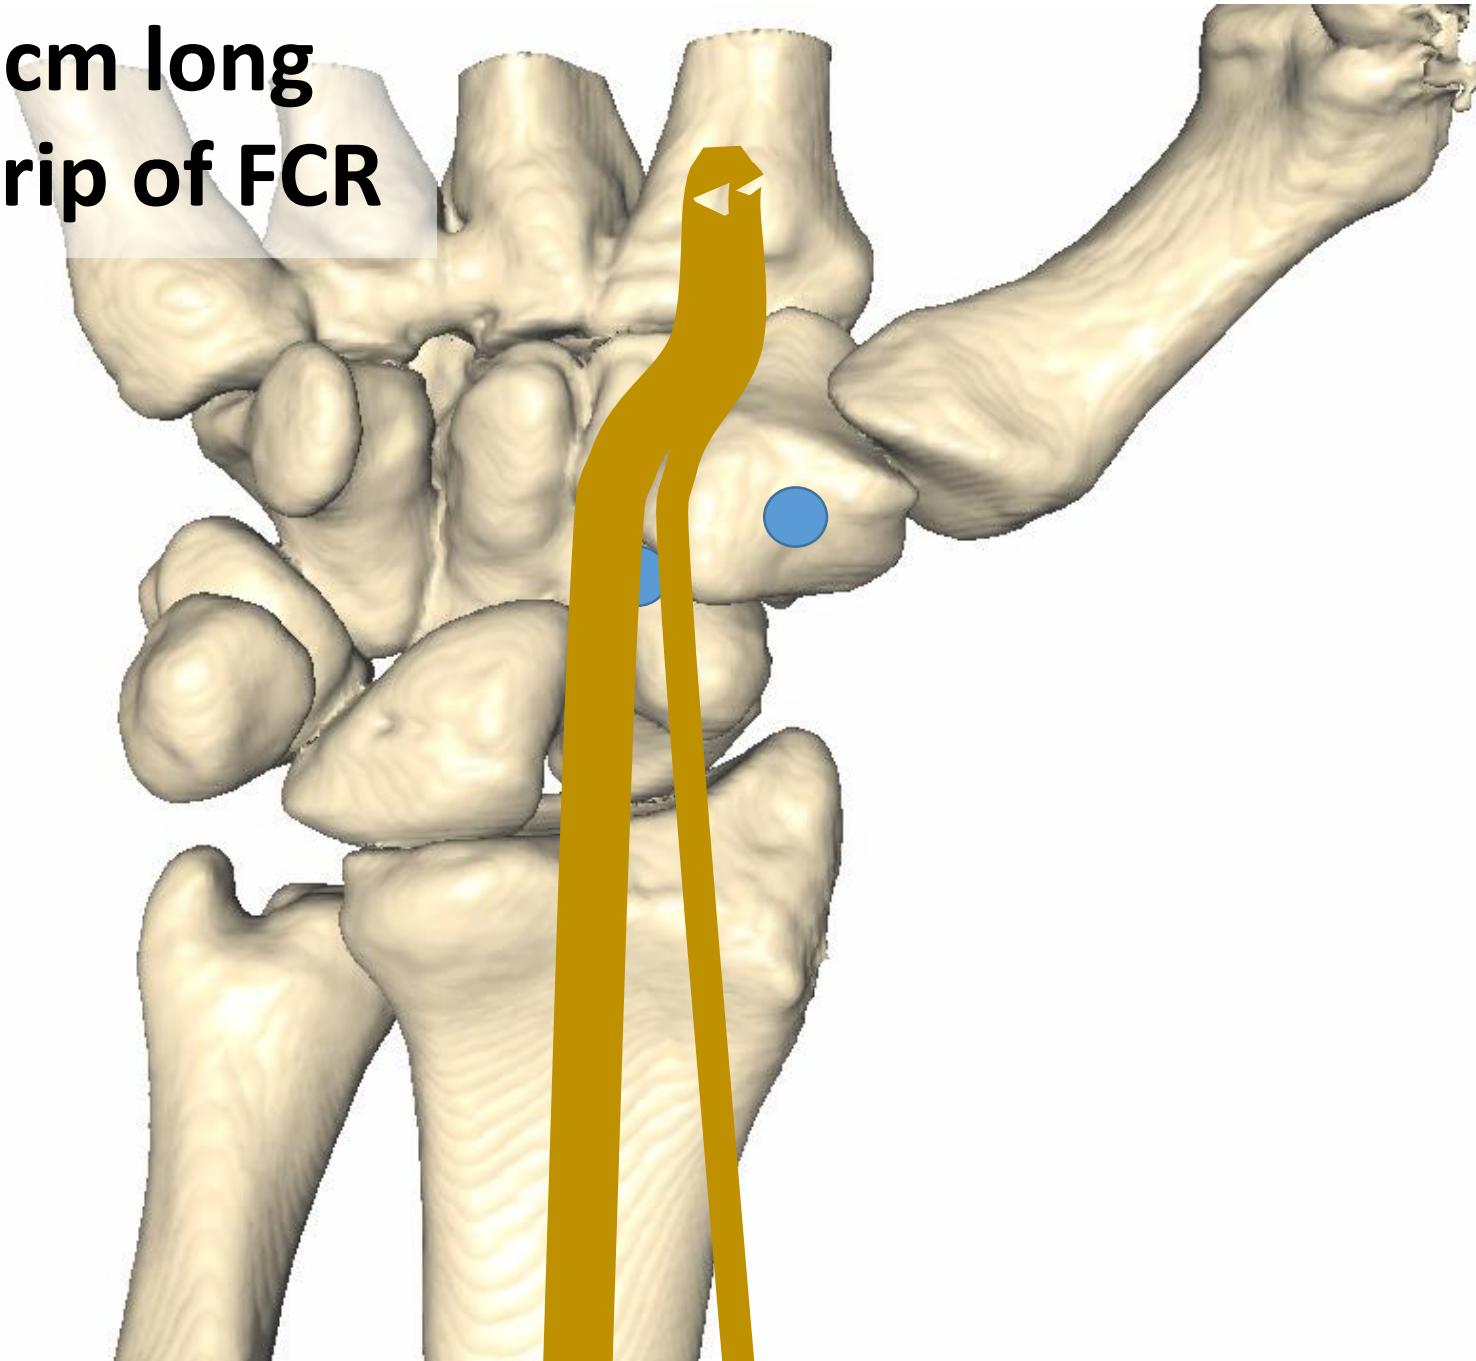

**Volar**

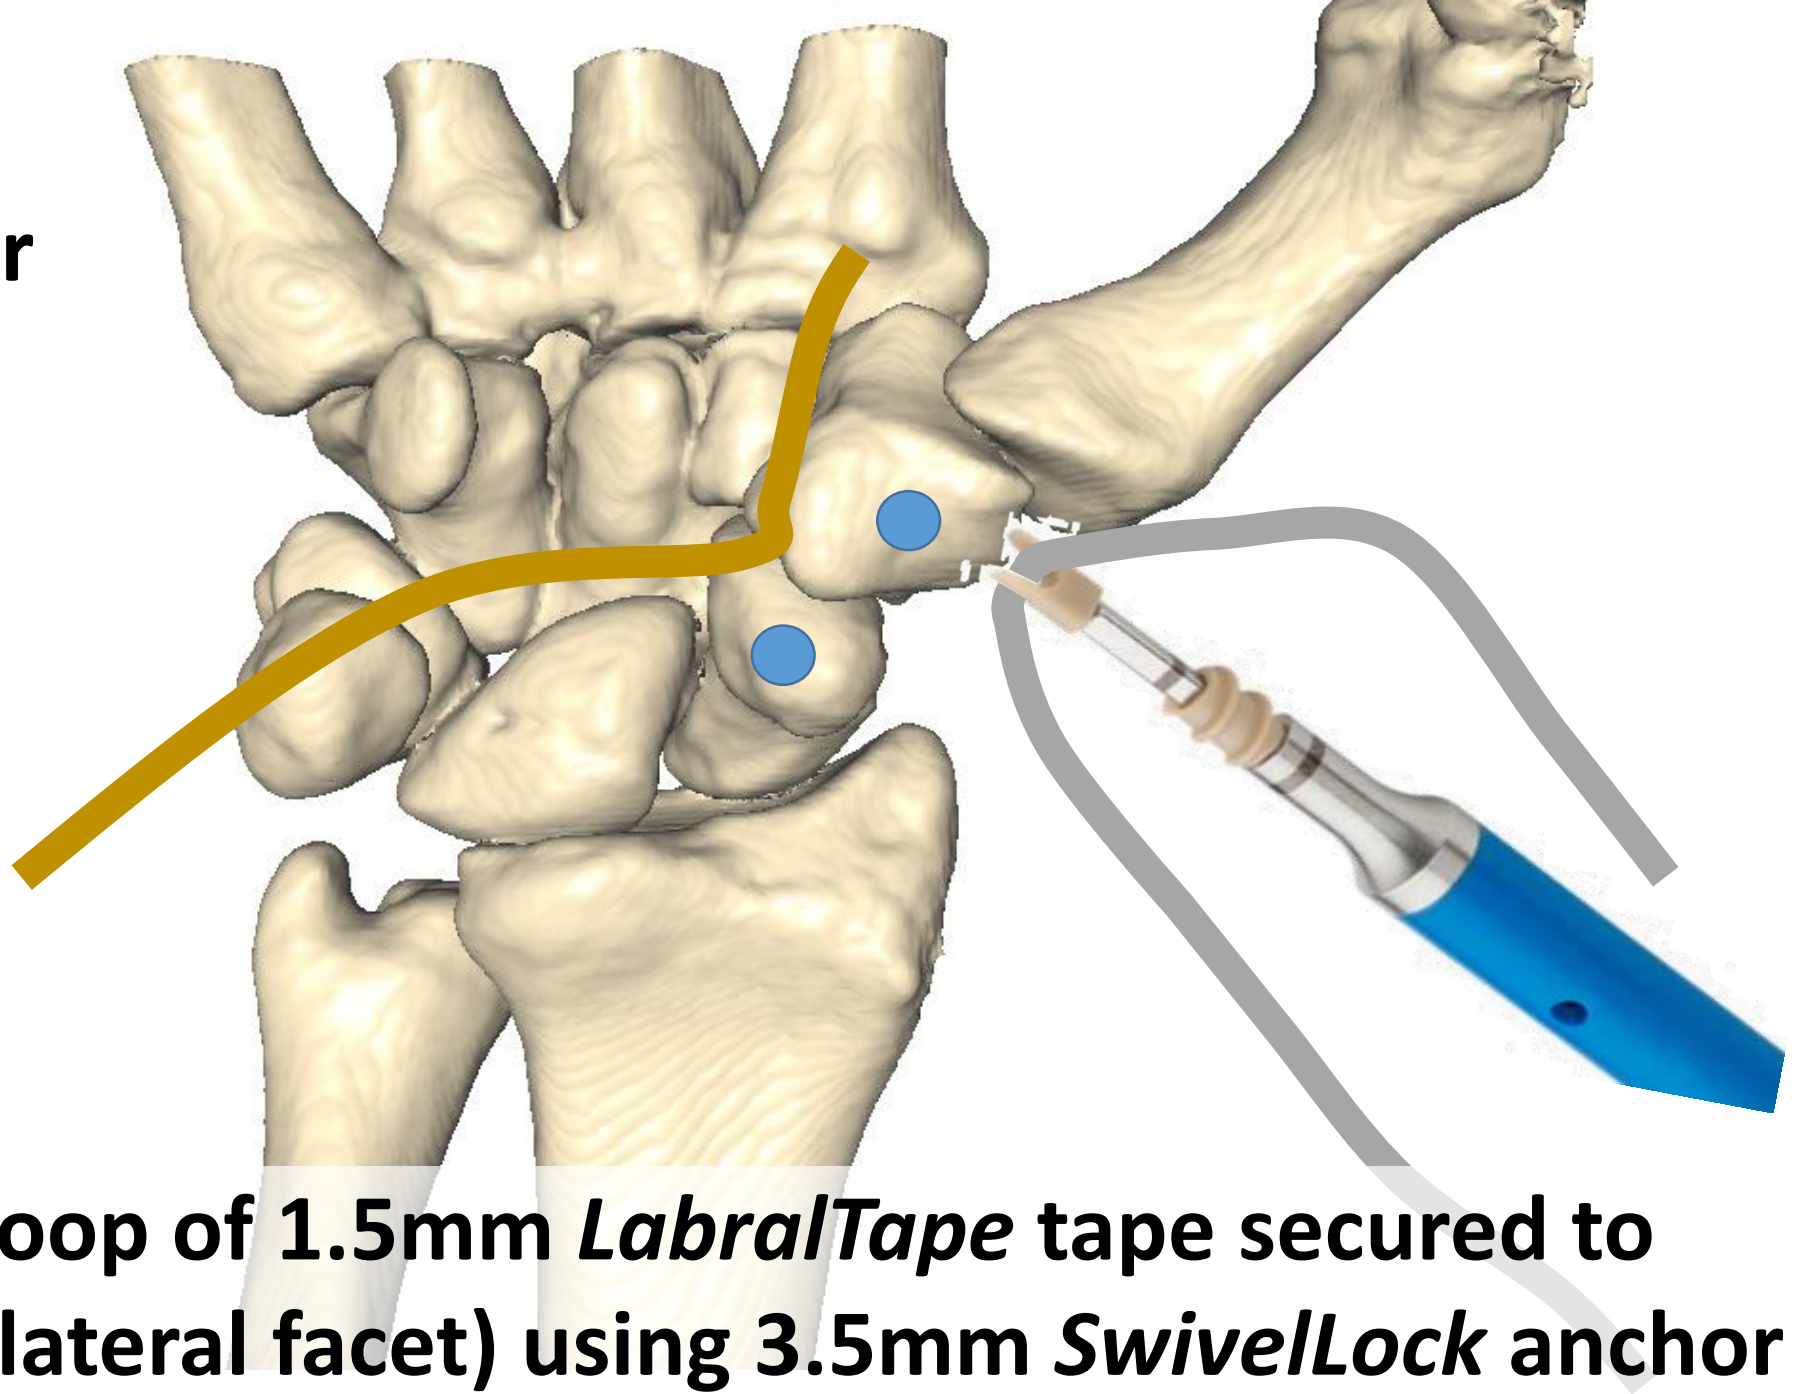

**Double loop of 1.5mm *LabralTape* tape secured to Trapezium (lateral facet) using 3.5mm *SwivelLock* anchor**





A 3D anatomical model of a human wrist joint, showing the carpal bones, metacarpals, and phalanges. A thick yellow line, representing an FCR strip, originates from the base of the thumb and curves across the wrist. Two blue circular markers are placed on the scaphoid and trapezoid bones. A grey surgical instrument is shown pointing at the trapezoid marker.

**FCR strip**

**1.5mm 36" *LabralTape*  
(doubled)**

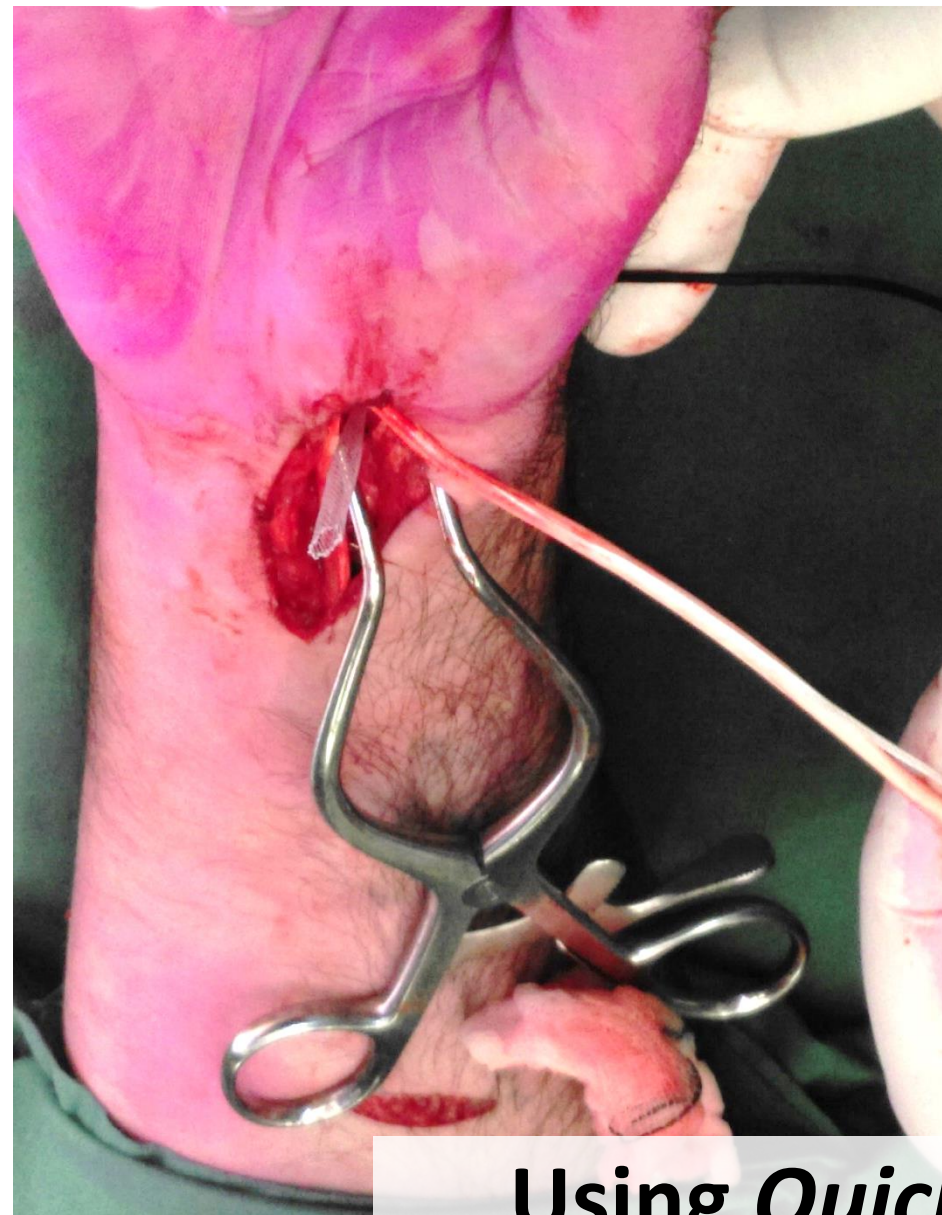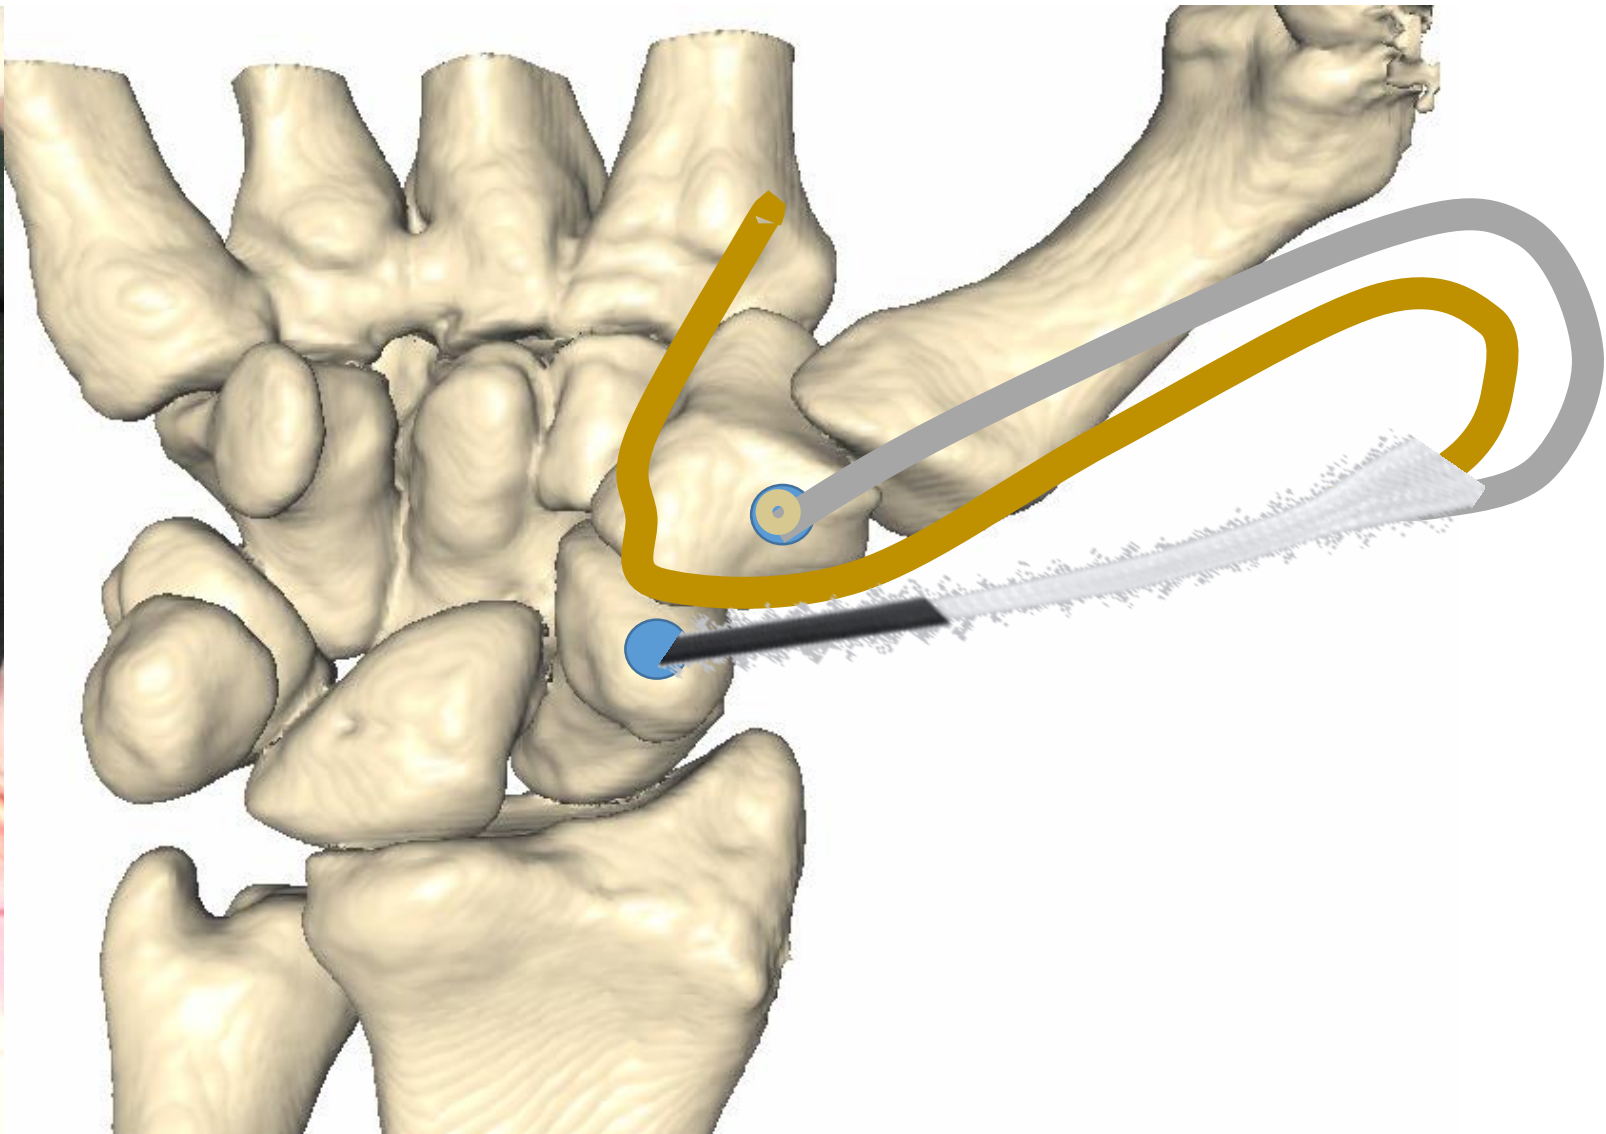

**Using *Quick Pass* Tendon Shuttle, FCR strip and *LabralTape* passed volar to dorsal through scaphoid**



Using *Quick Pass* Tendon Shuttle, FCR strip and *LabralTape* passed volar to dorsal through scaphoid to dorsal wound

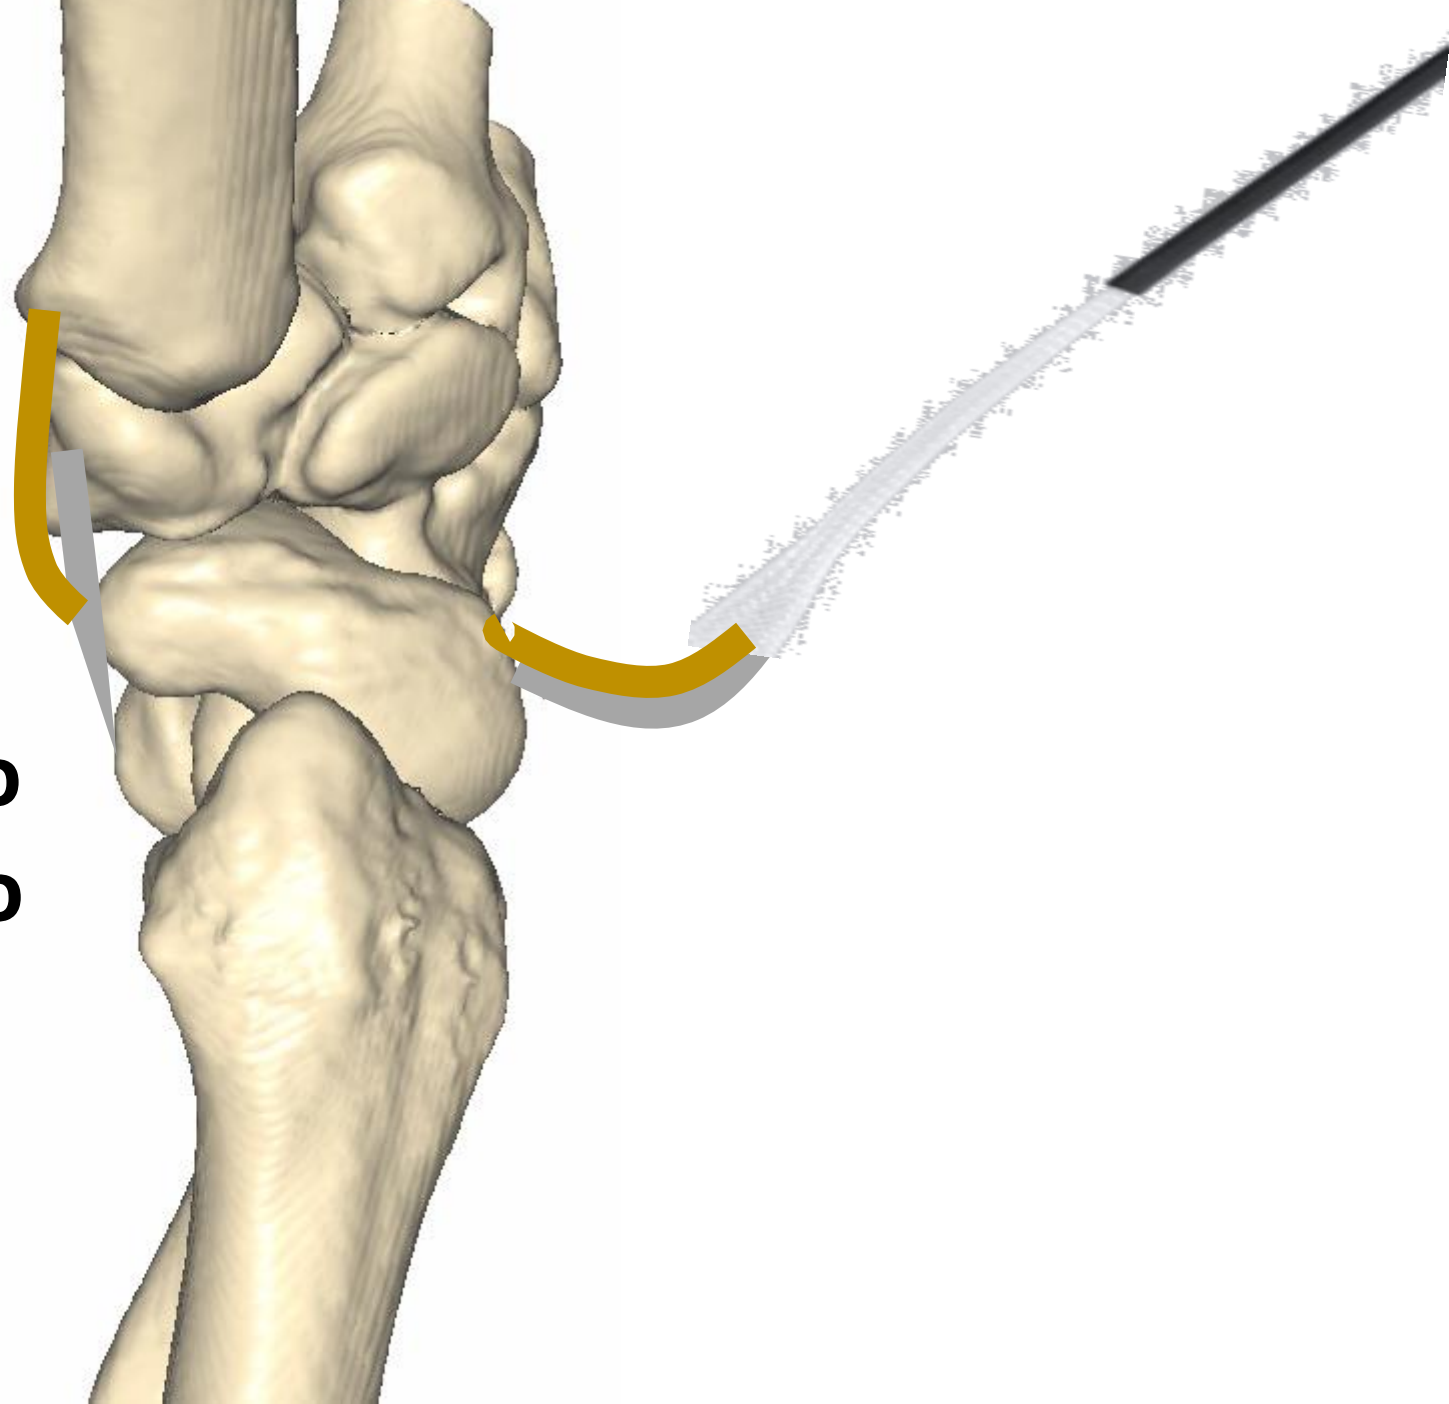

**volar**

**Scapho-trapezium ligament restored**

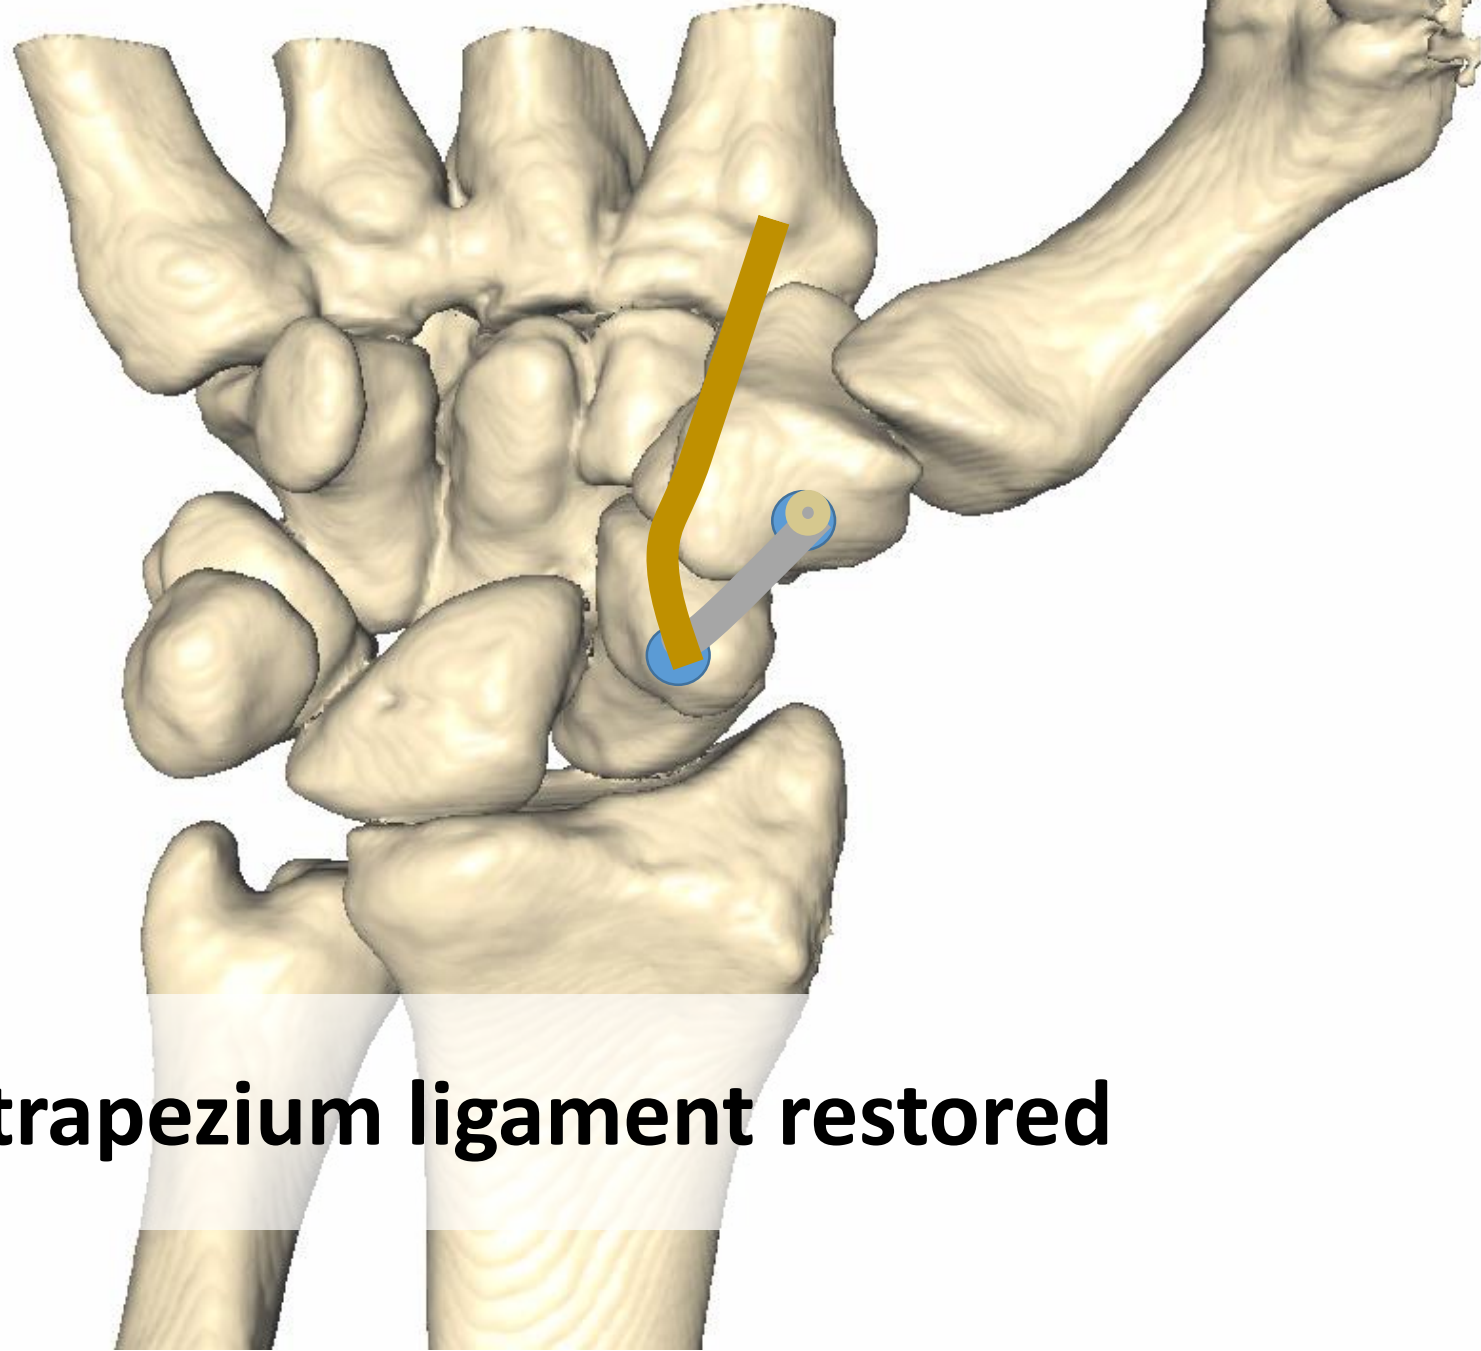



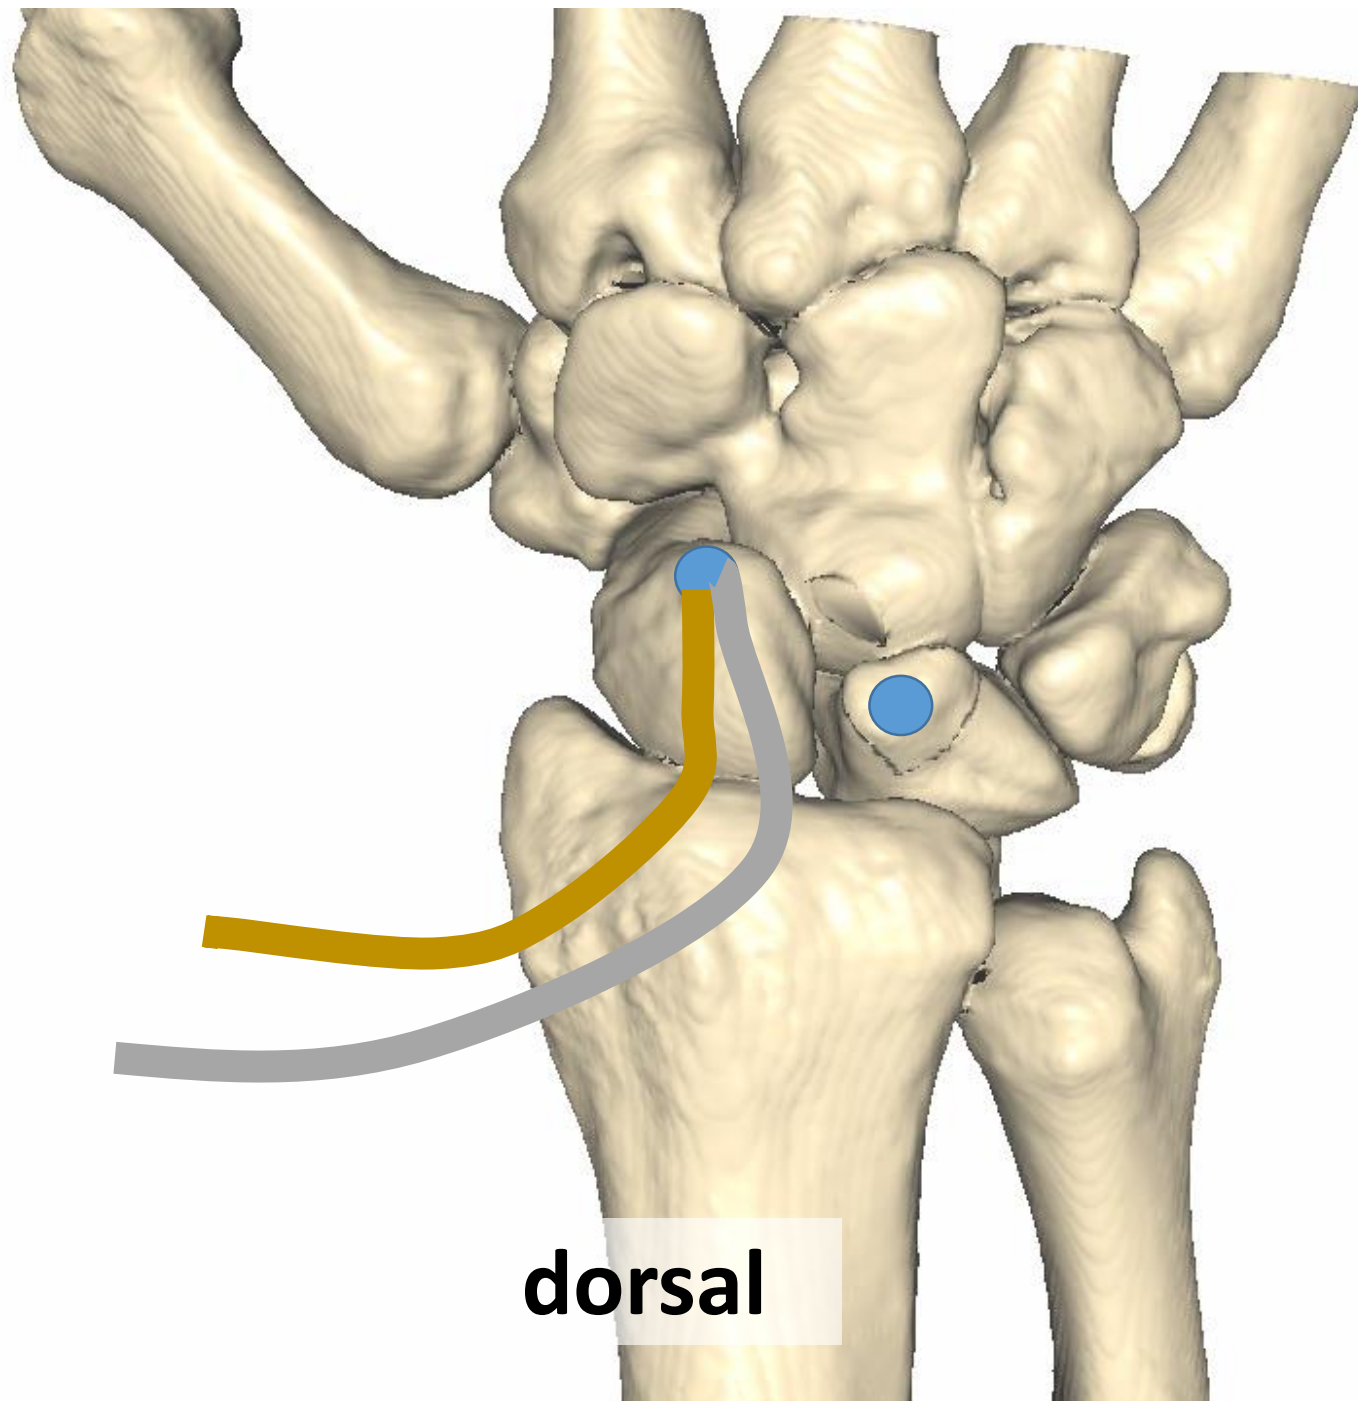

dorsal

**K-wire inserted to (just) exit on volar-ulnar lunate surface**  
**\*\* Care to avoid mid-carpal joint and volar structures \*\***

**Curved smooth instrument  
through Midcarpal joint  
protects and guides.  
Check with imaging.**

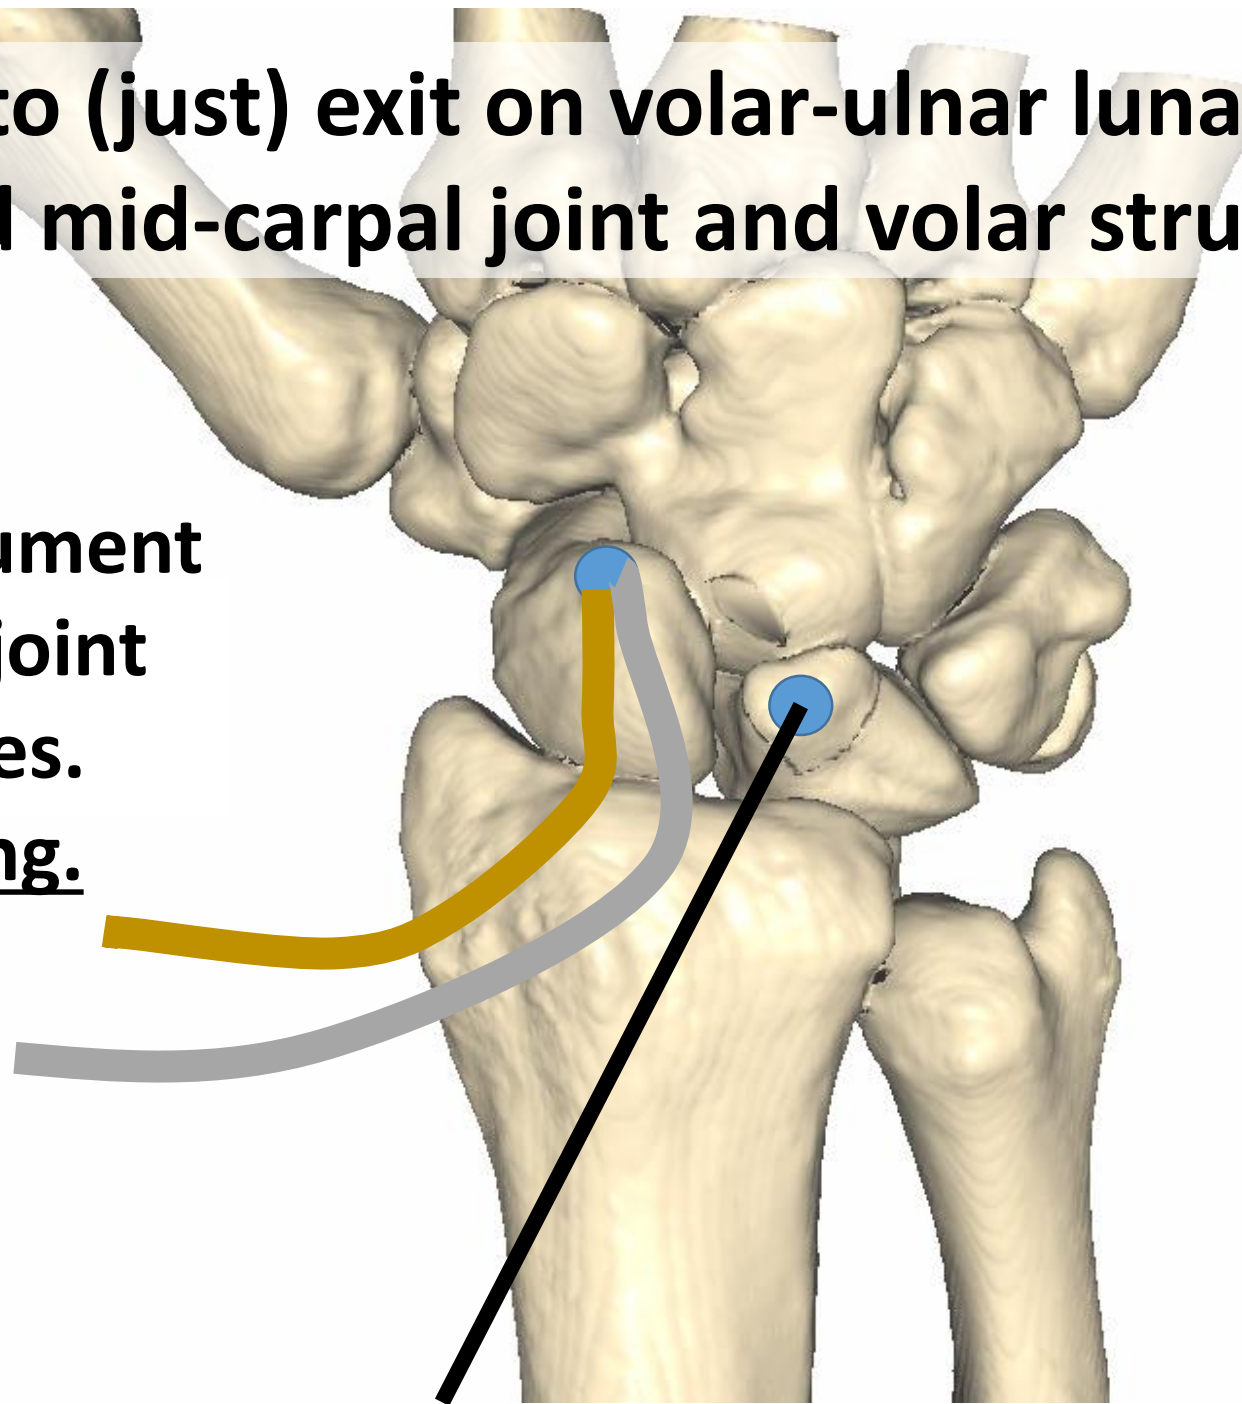



## **3mm drill to create lunate tunnel**

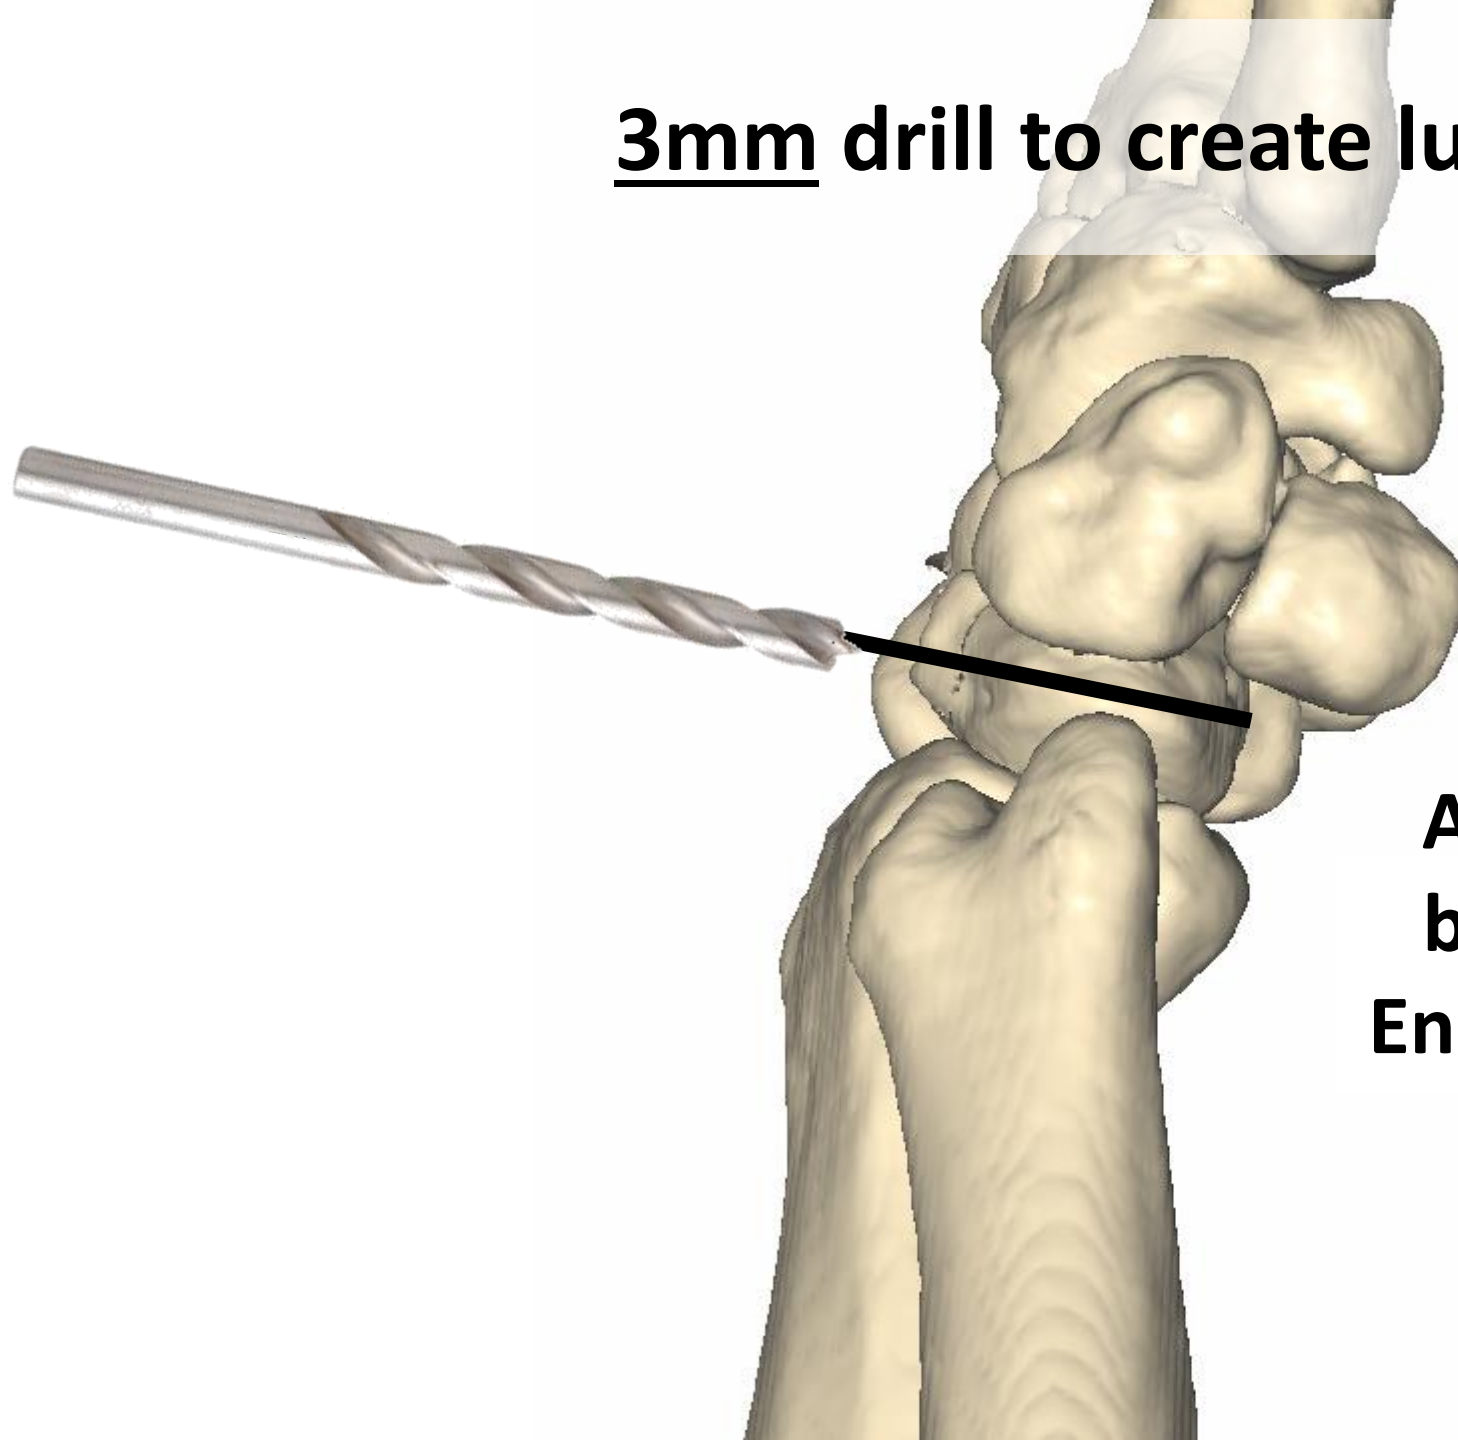

**Advance drill just to  
breach volar cortex.  
Ensure k-wire does not  
advance!!!**

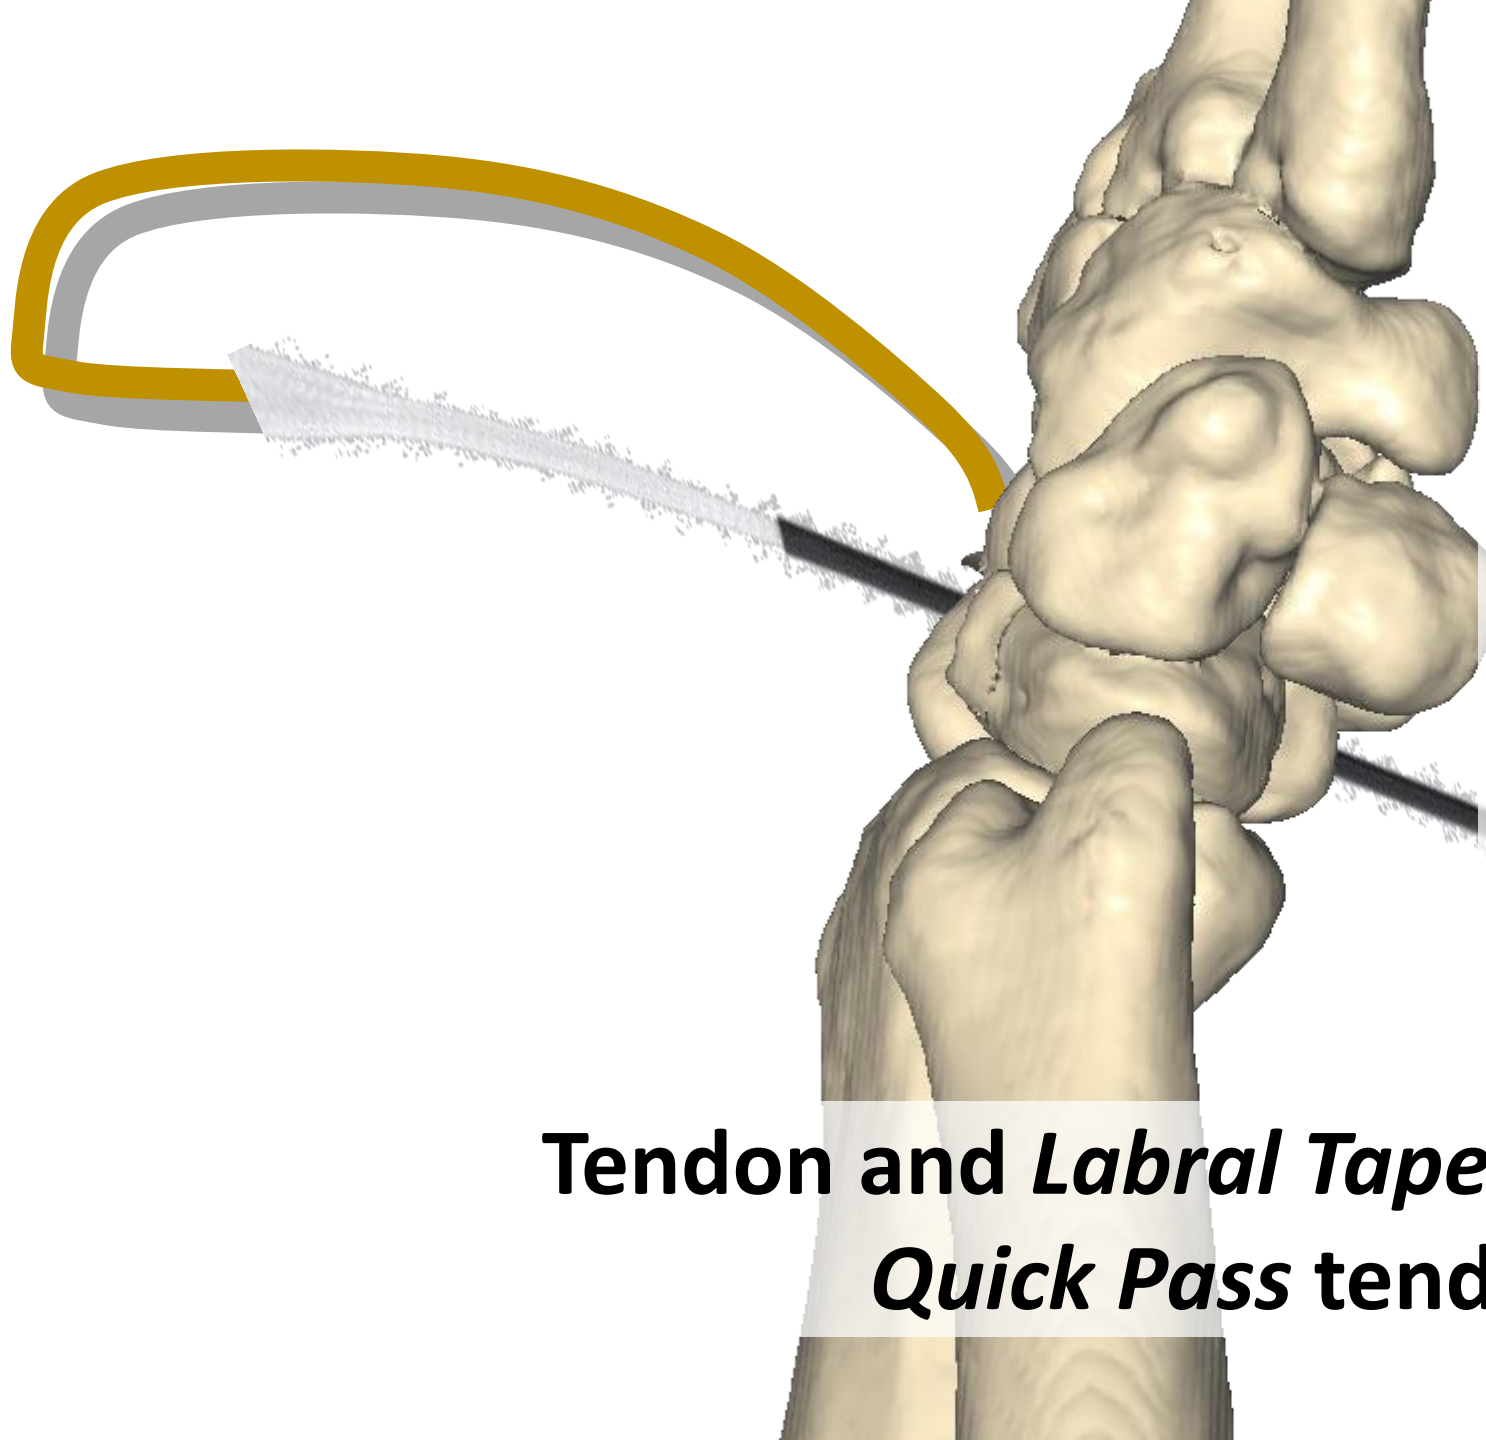

**Extend the volar FCR  
wound and blunt dissect  
across the volar capsule  
and under the carpal tunnel  
contents.**

**Locate and retrieve the  
tendon shuttle as it exits  
the volar lunate.**

**Tendon and *Labral Tape* are then loaded into  
*Quick Pass* tendon shuttle....**



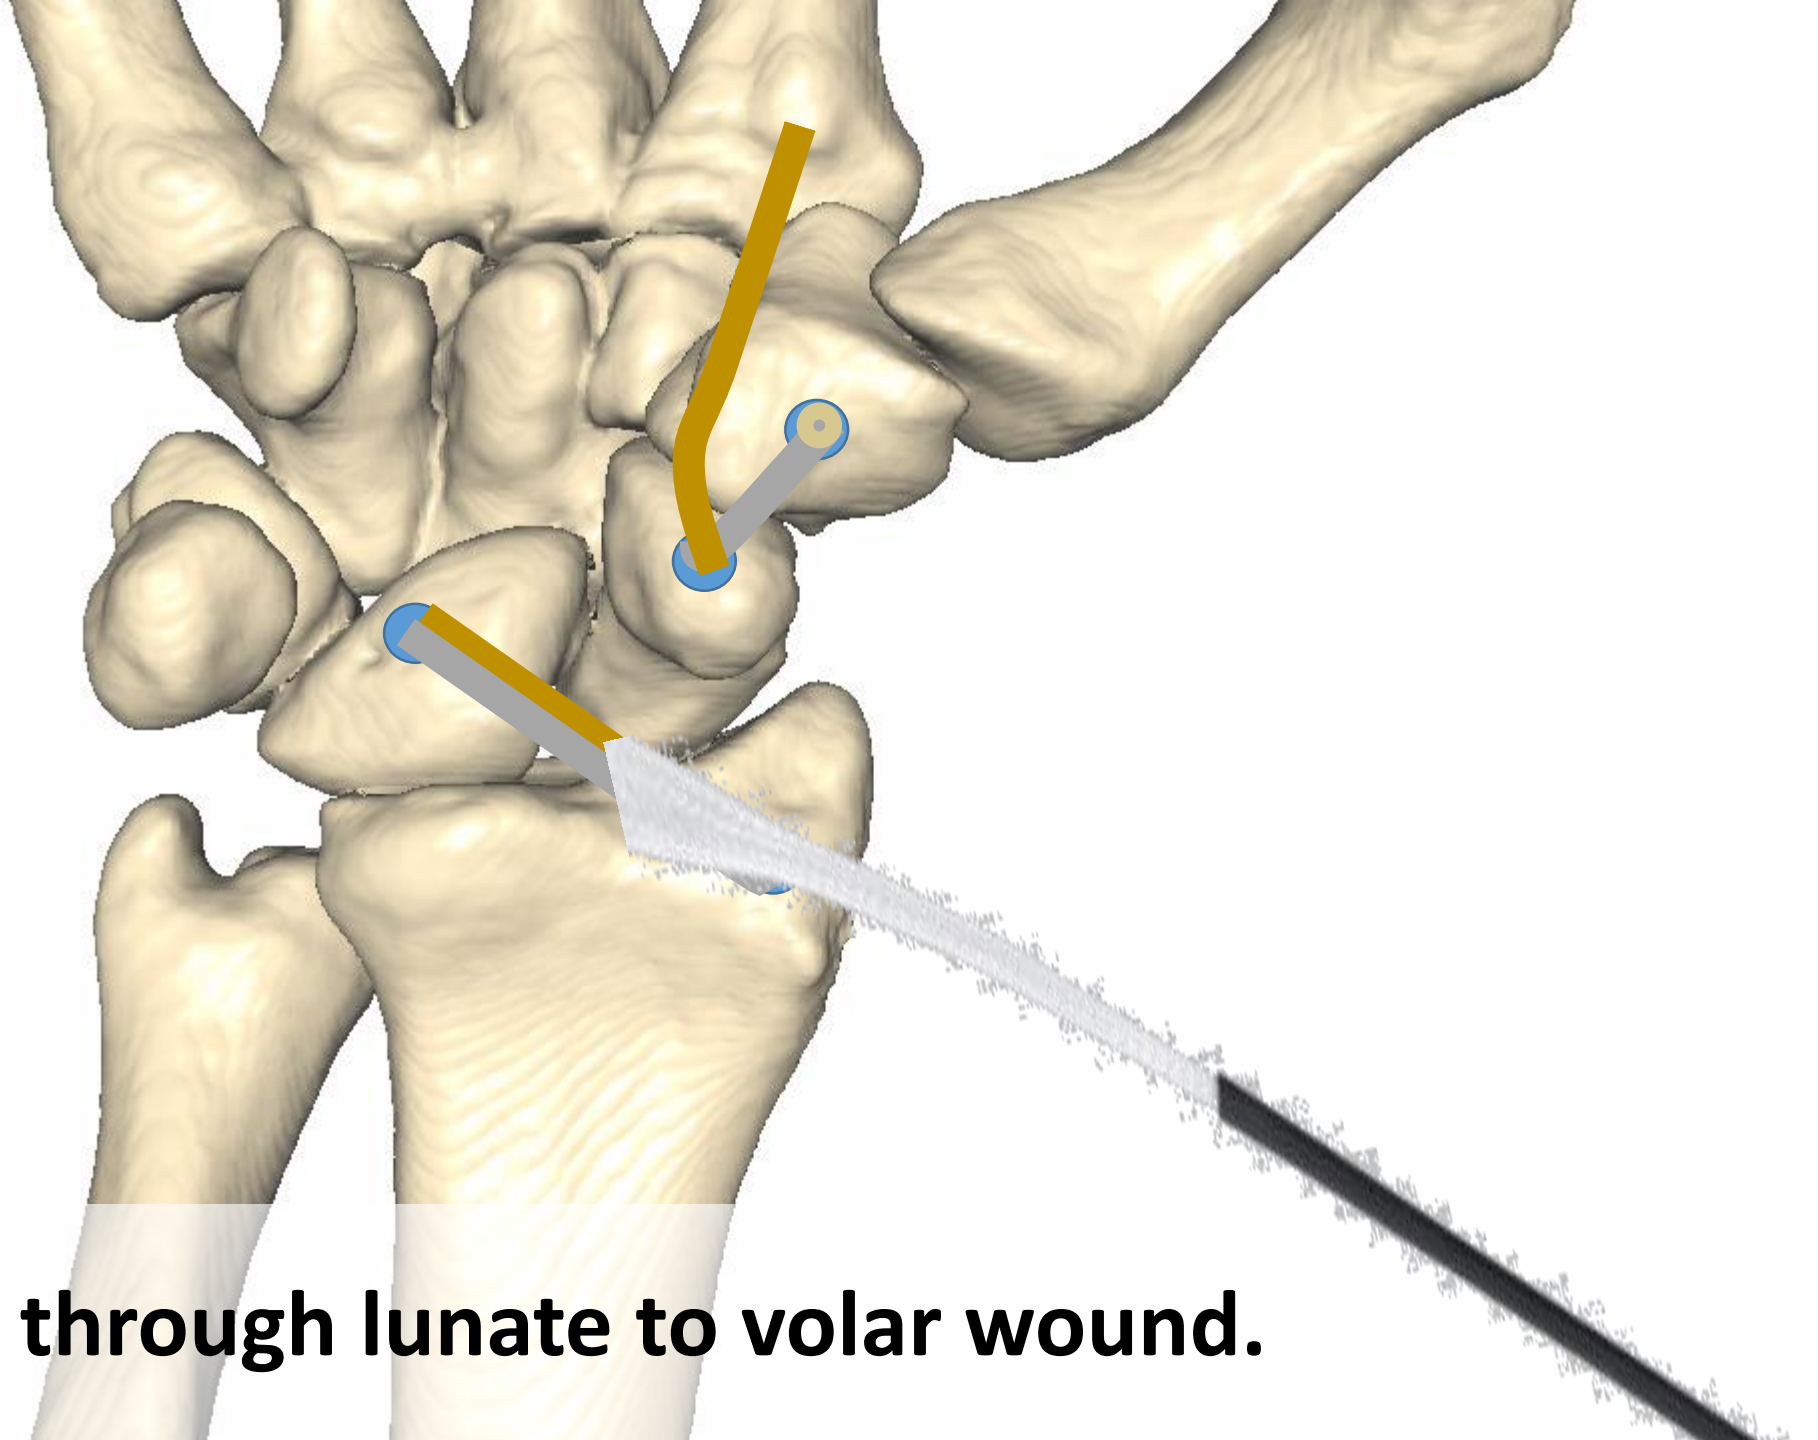

**... and advanced through lunate to volar wound.**

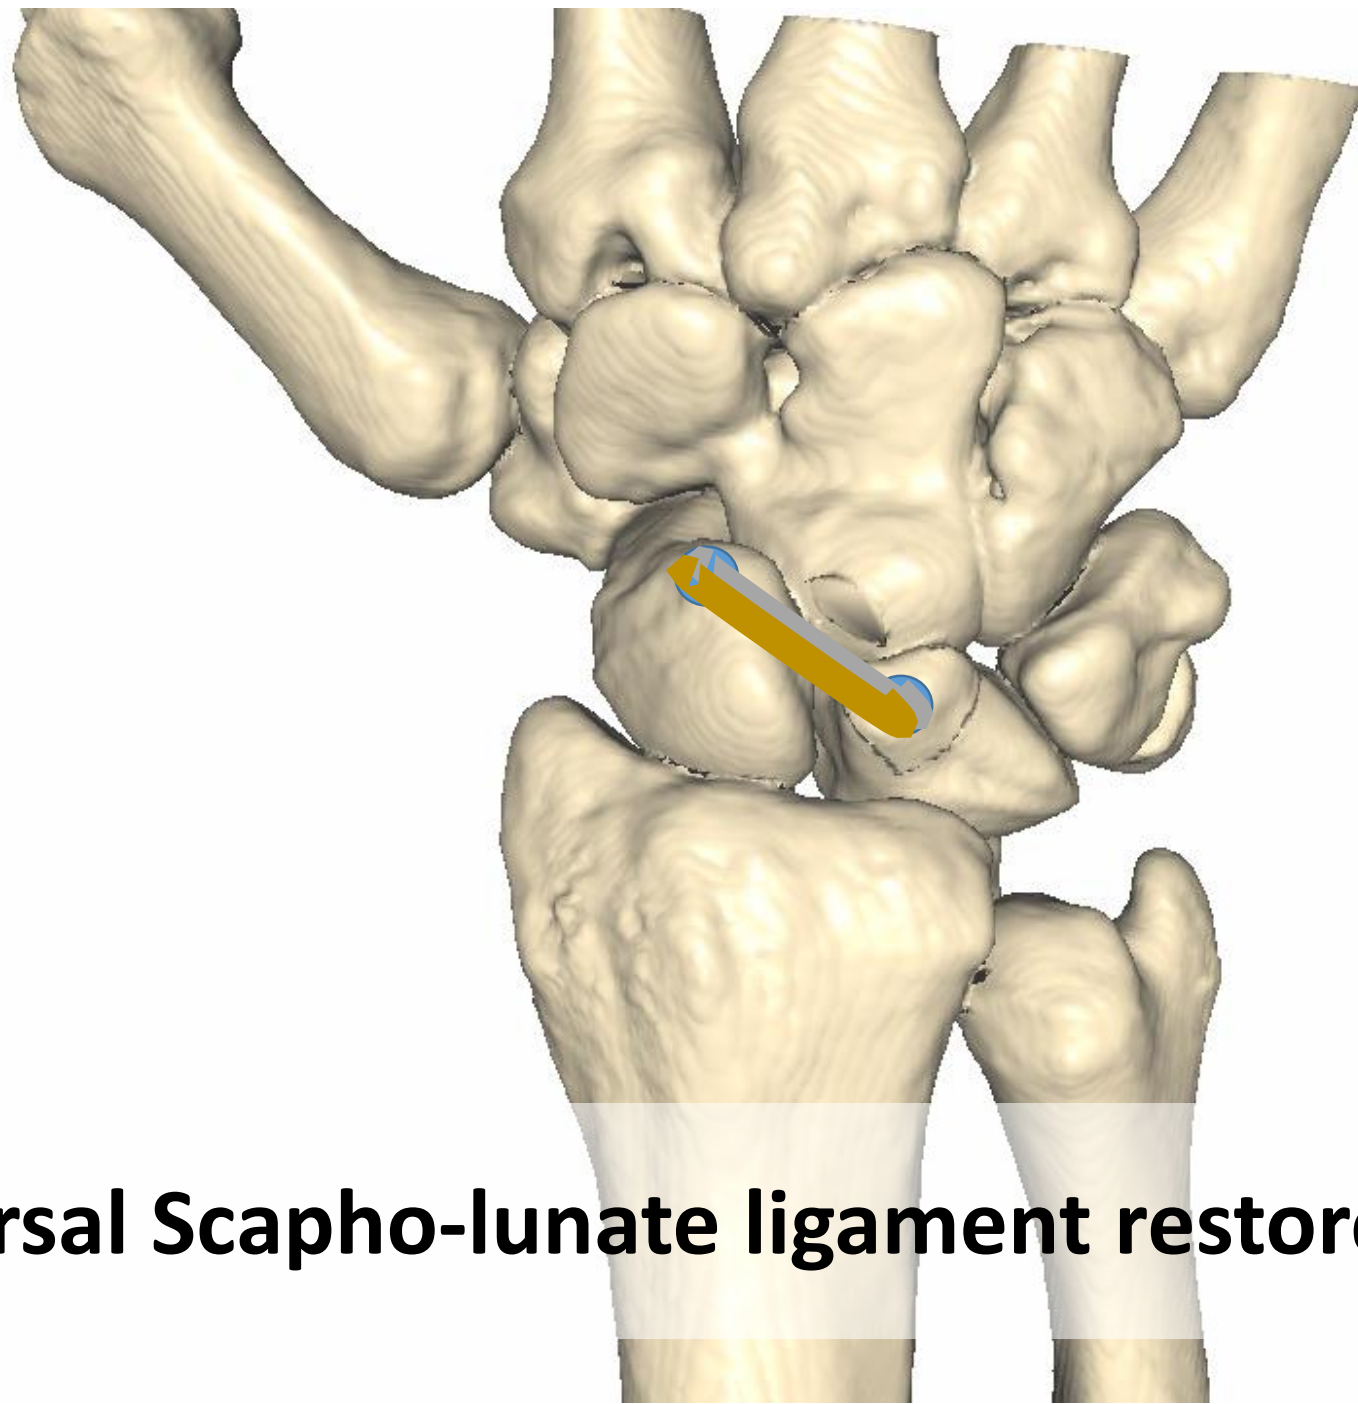

**Dorsal Scapho-lunate ligament restored.**



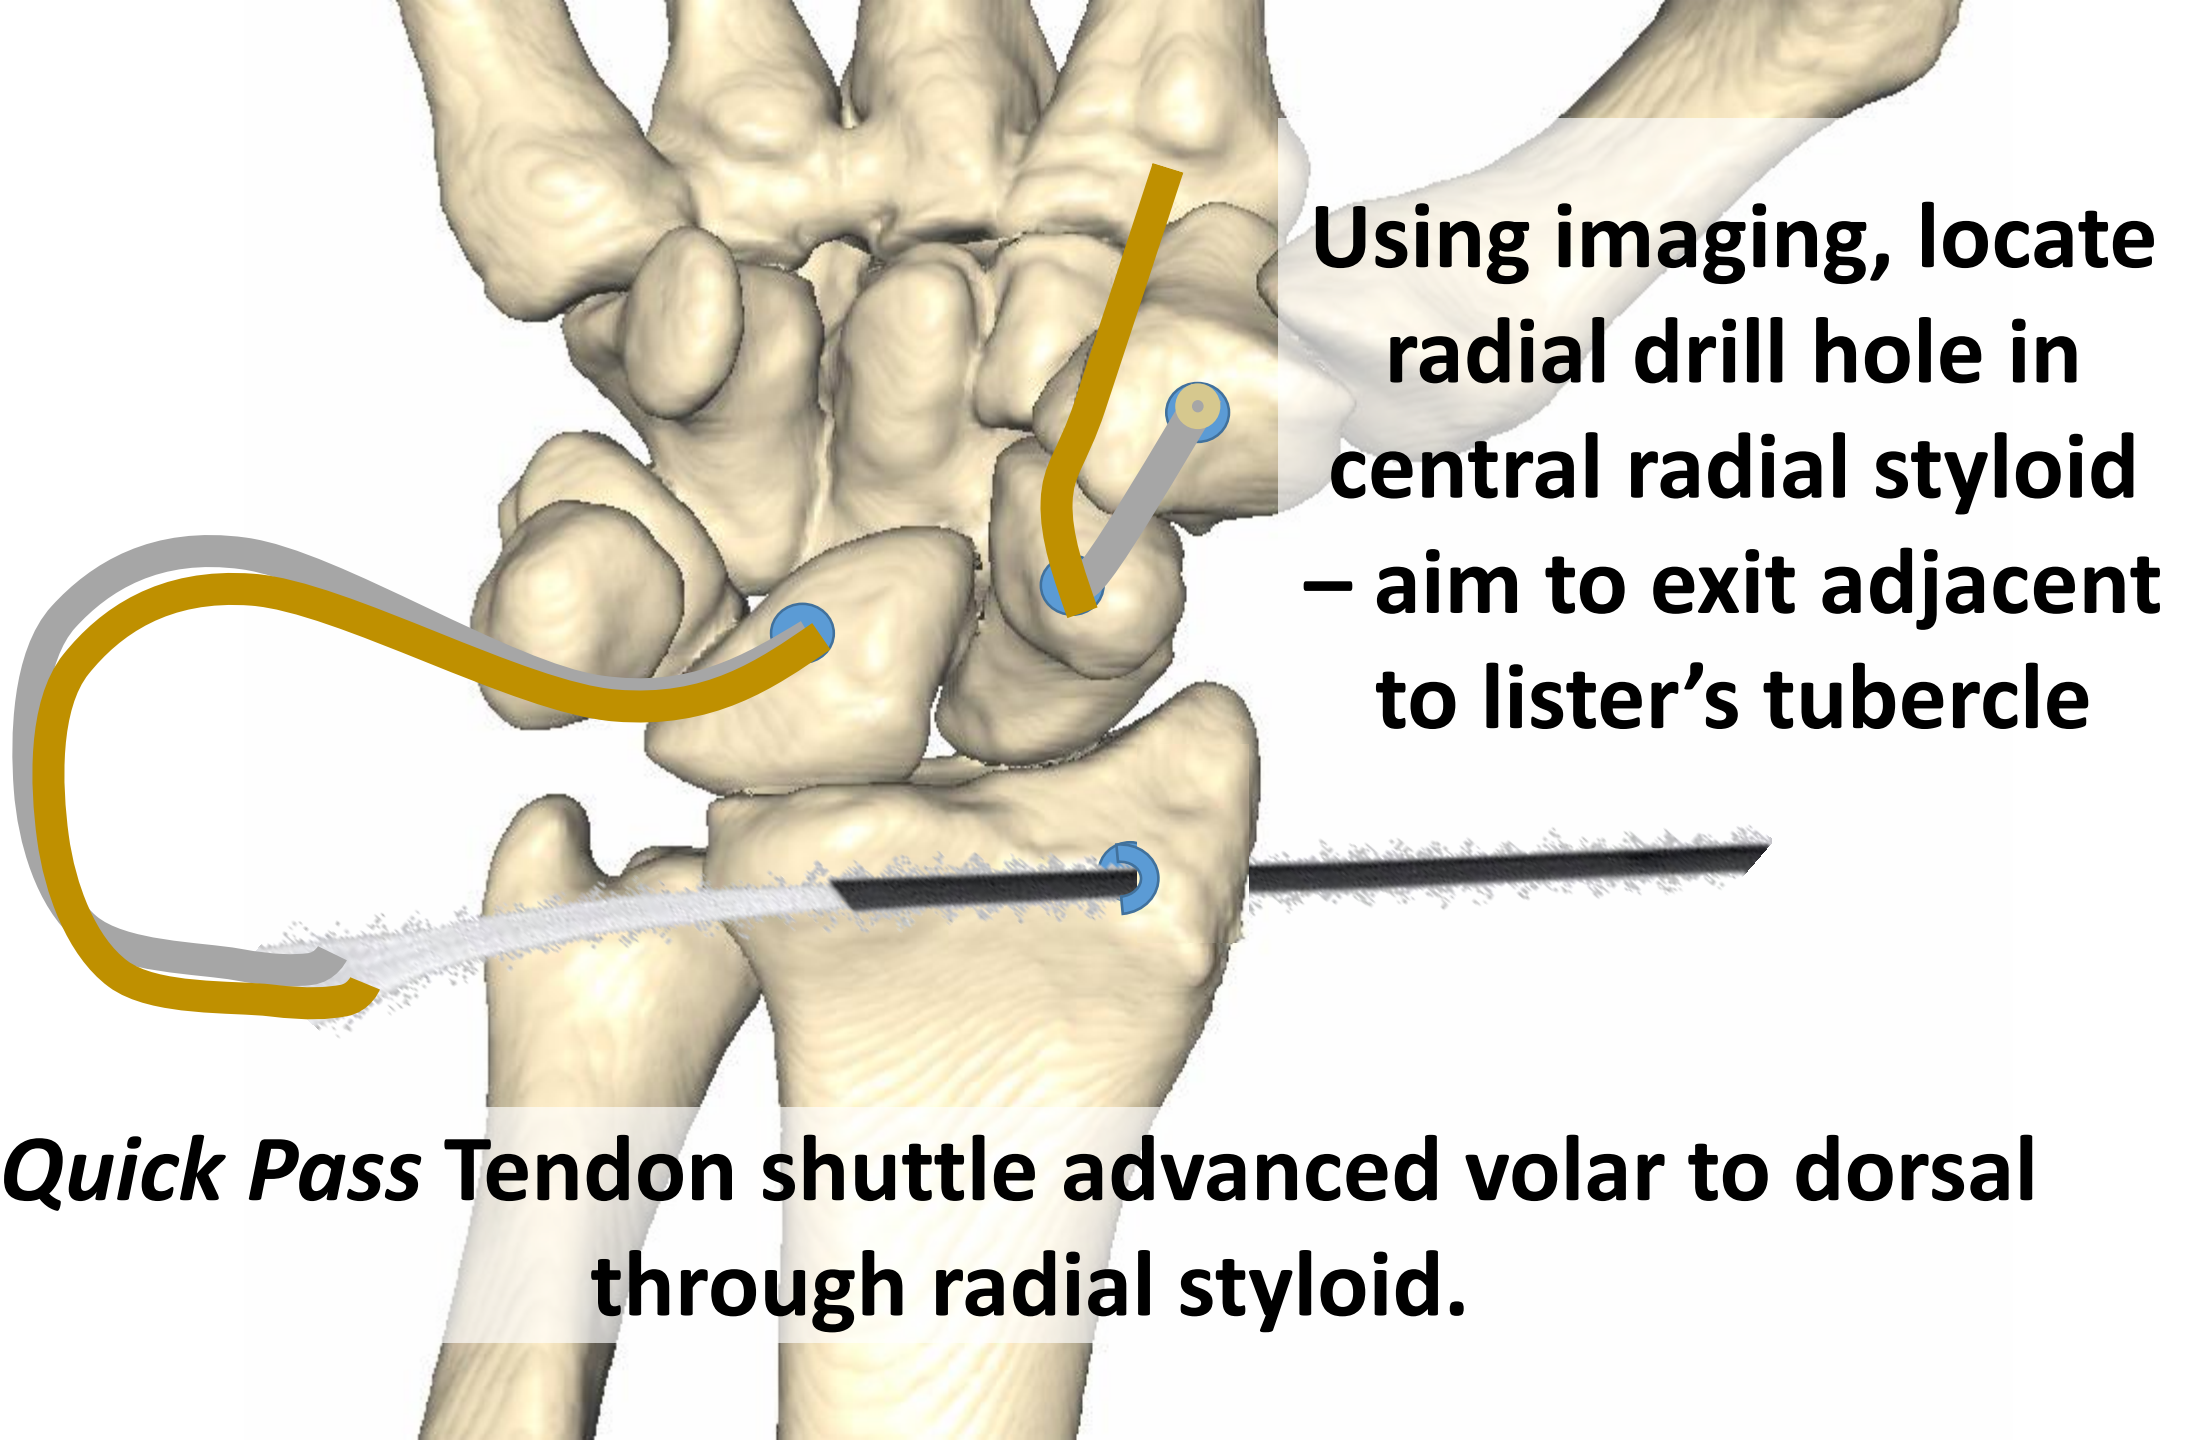

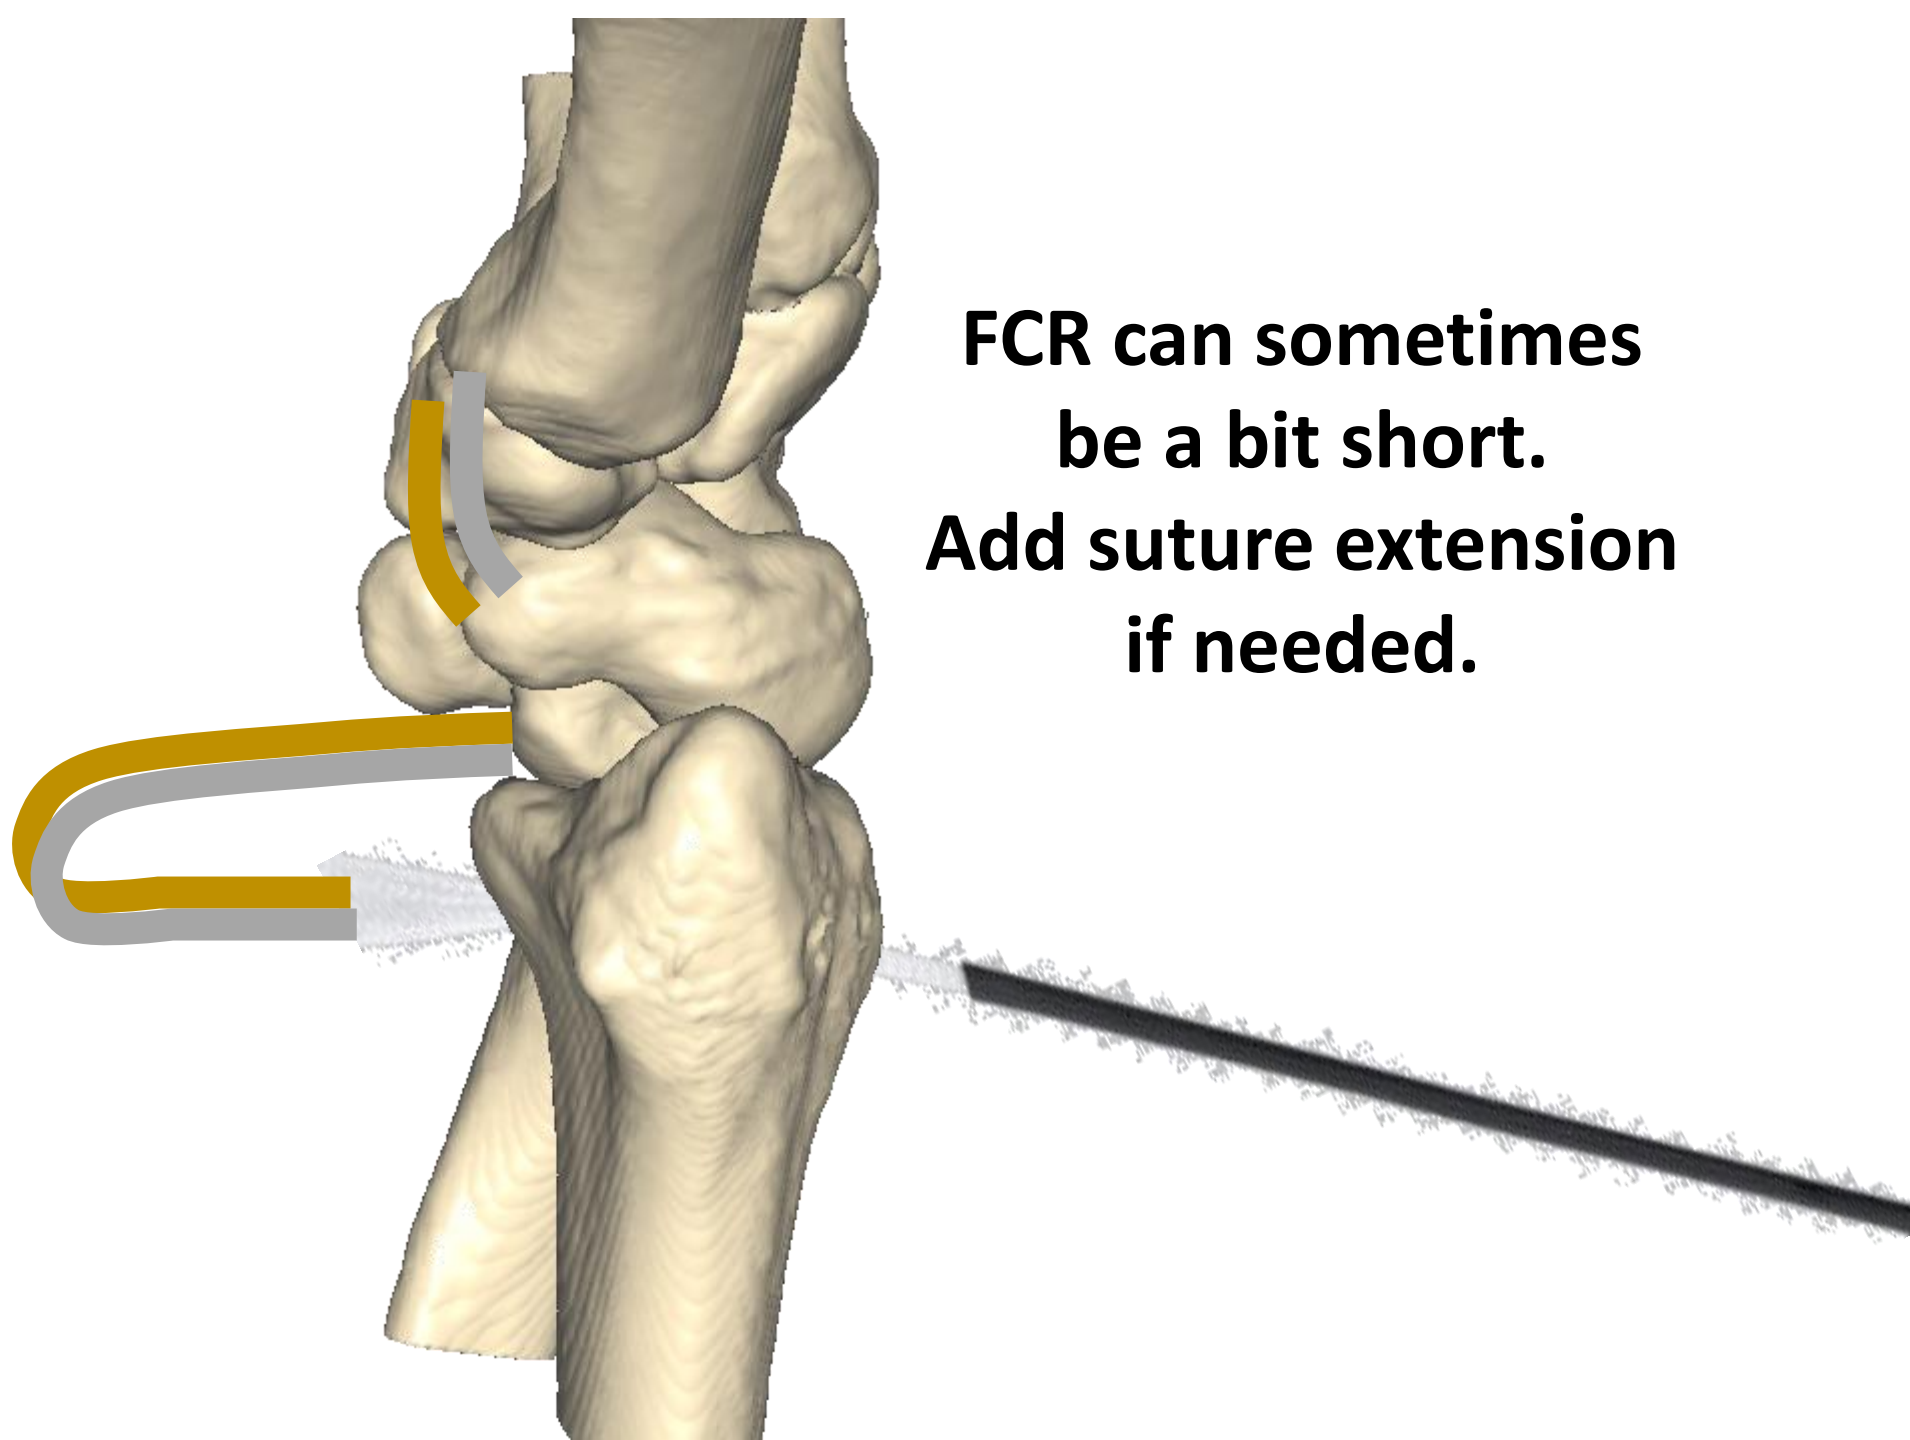

**FCR can sometimes  
be a bit short.  
Add suture extension  
if needed.**



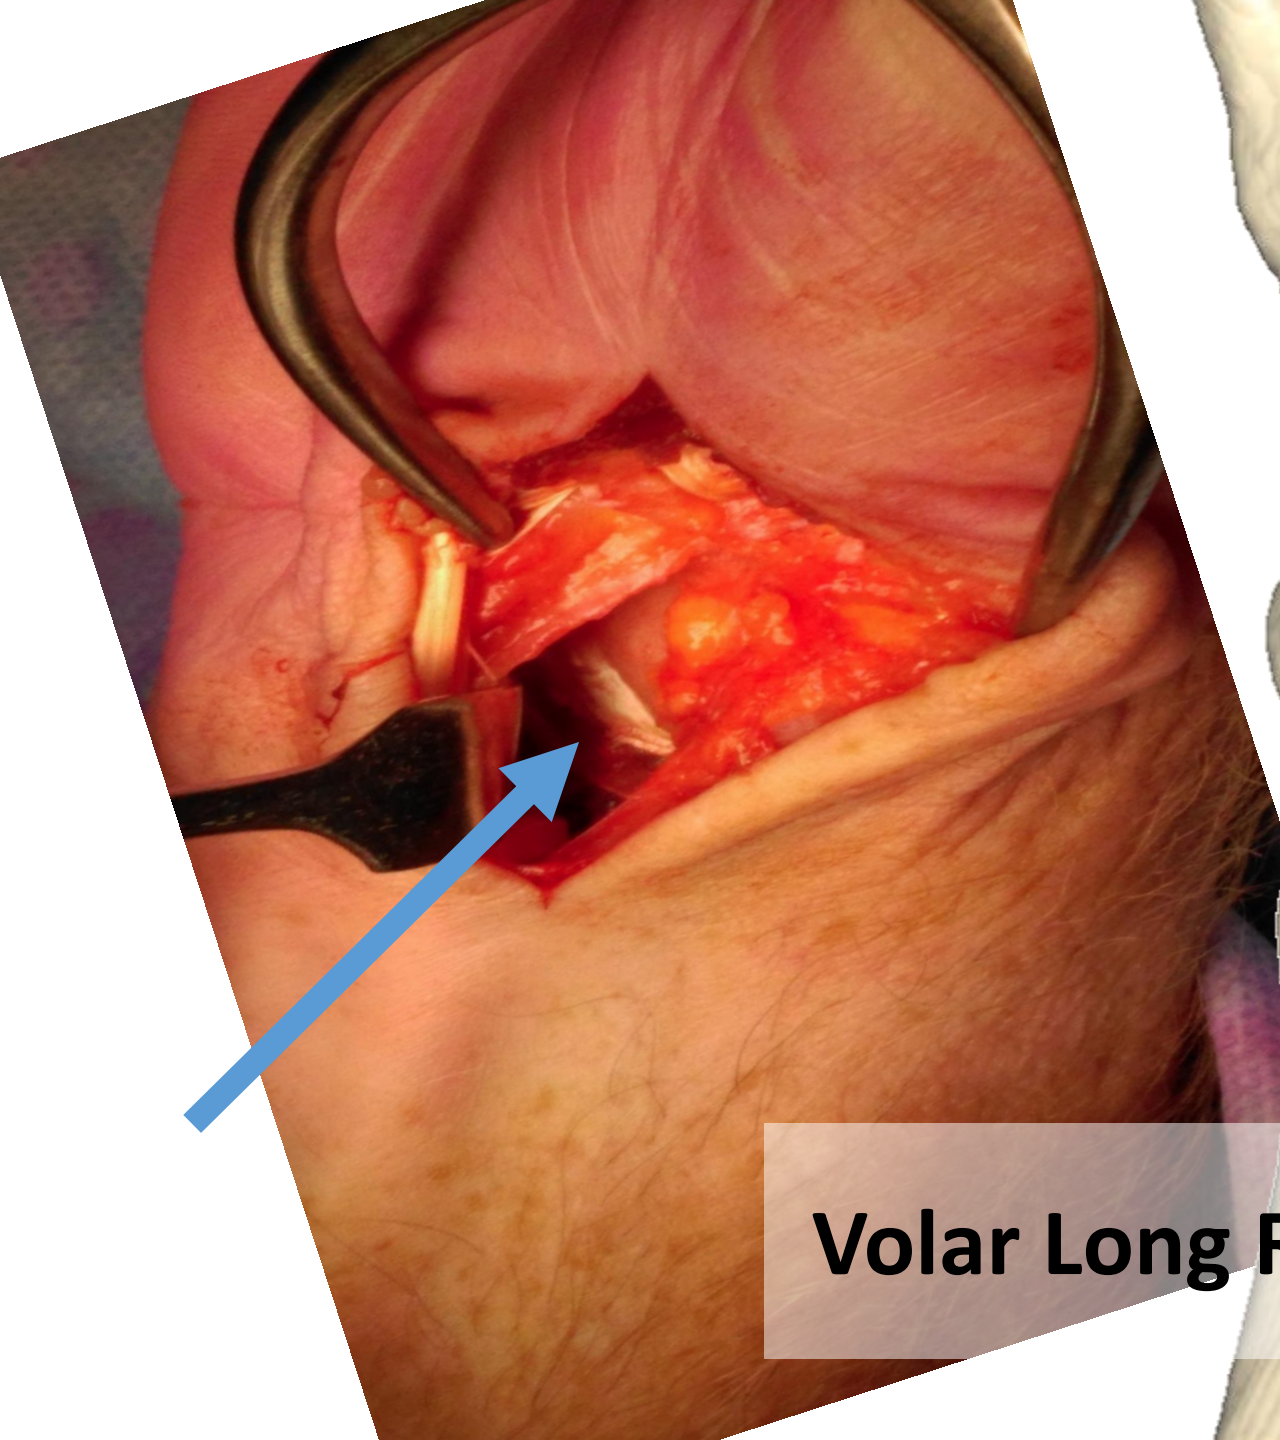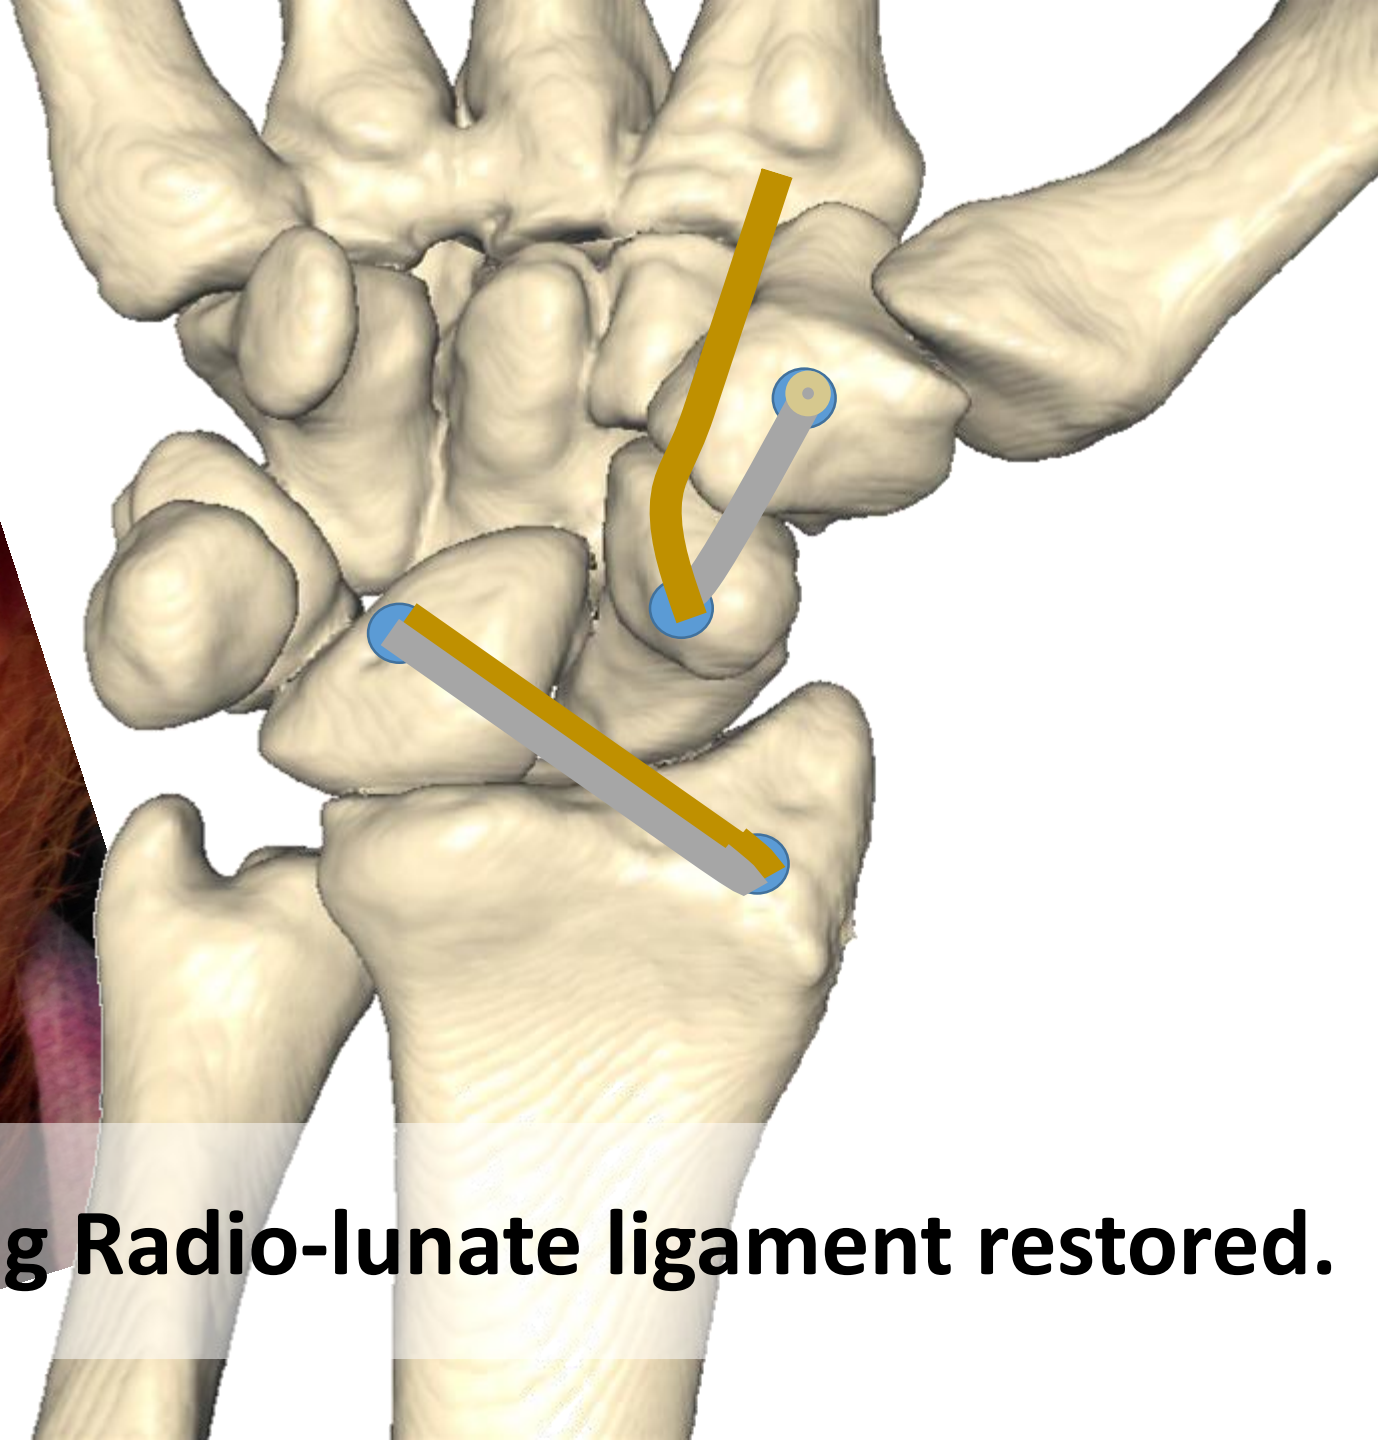

**Volar Long Radio-lunate ligament restored.**

**Apply adequate tension to FCR tendon and labral tape  
to reduce carpal bones, and secure dorsally with  
(3mm or 4 mm) interference screw**

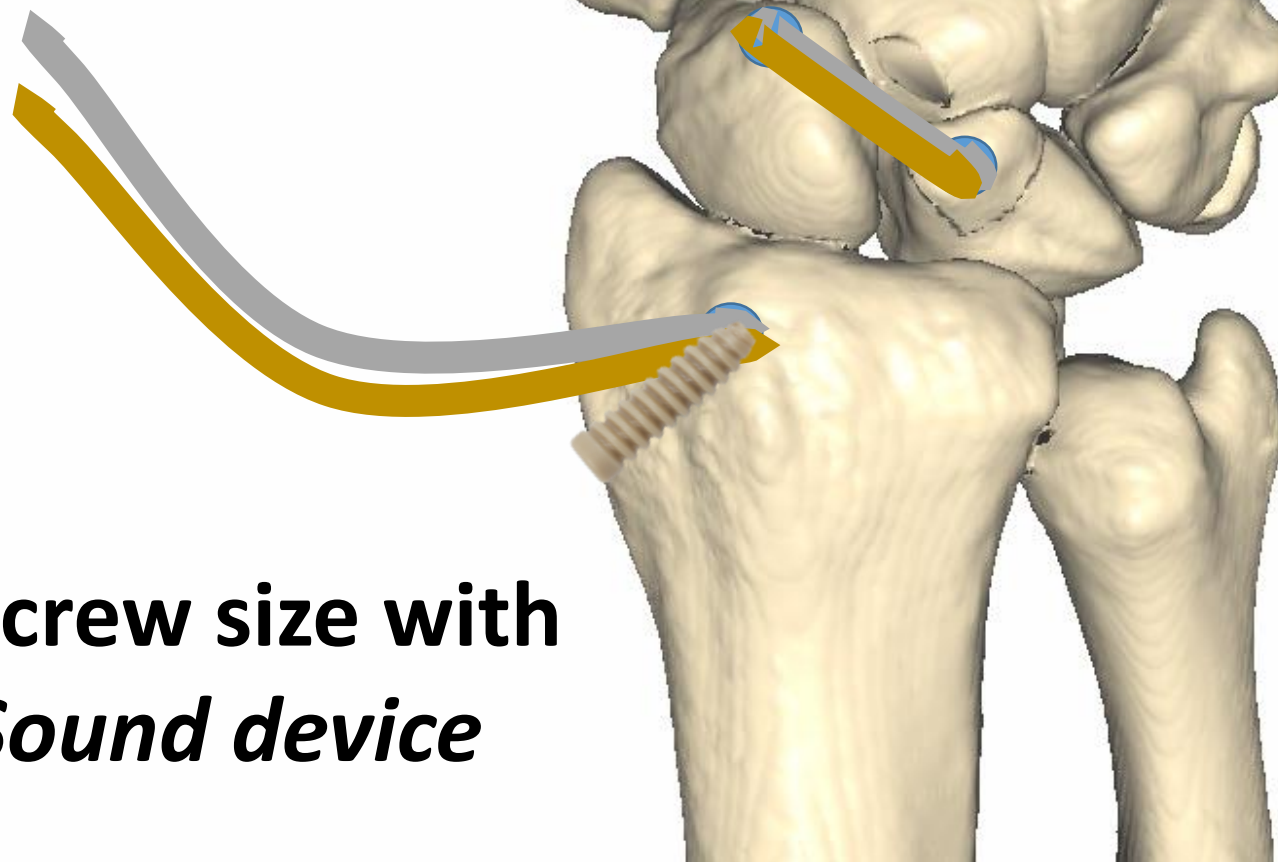

**Determine screw size with  
*Stepped Sound device***



**The interference screw fixation of the FCR tendon and labral tape is augmented by an additional Swivel-Lock anchor more proximally on the dorsal radius.**

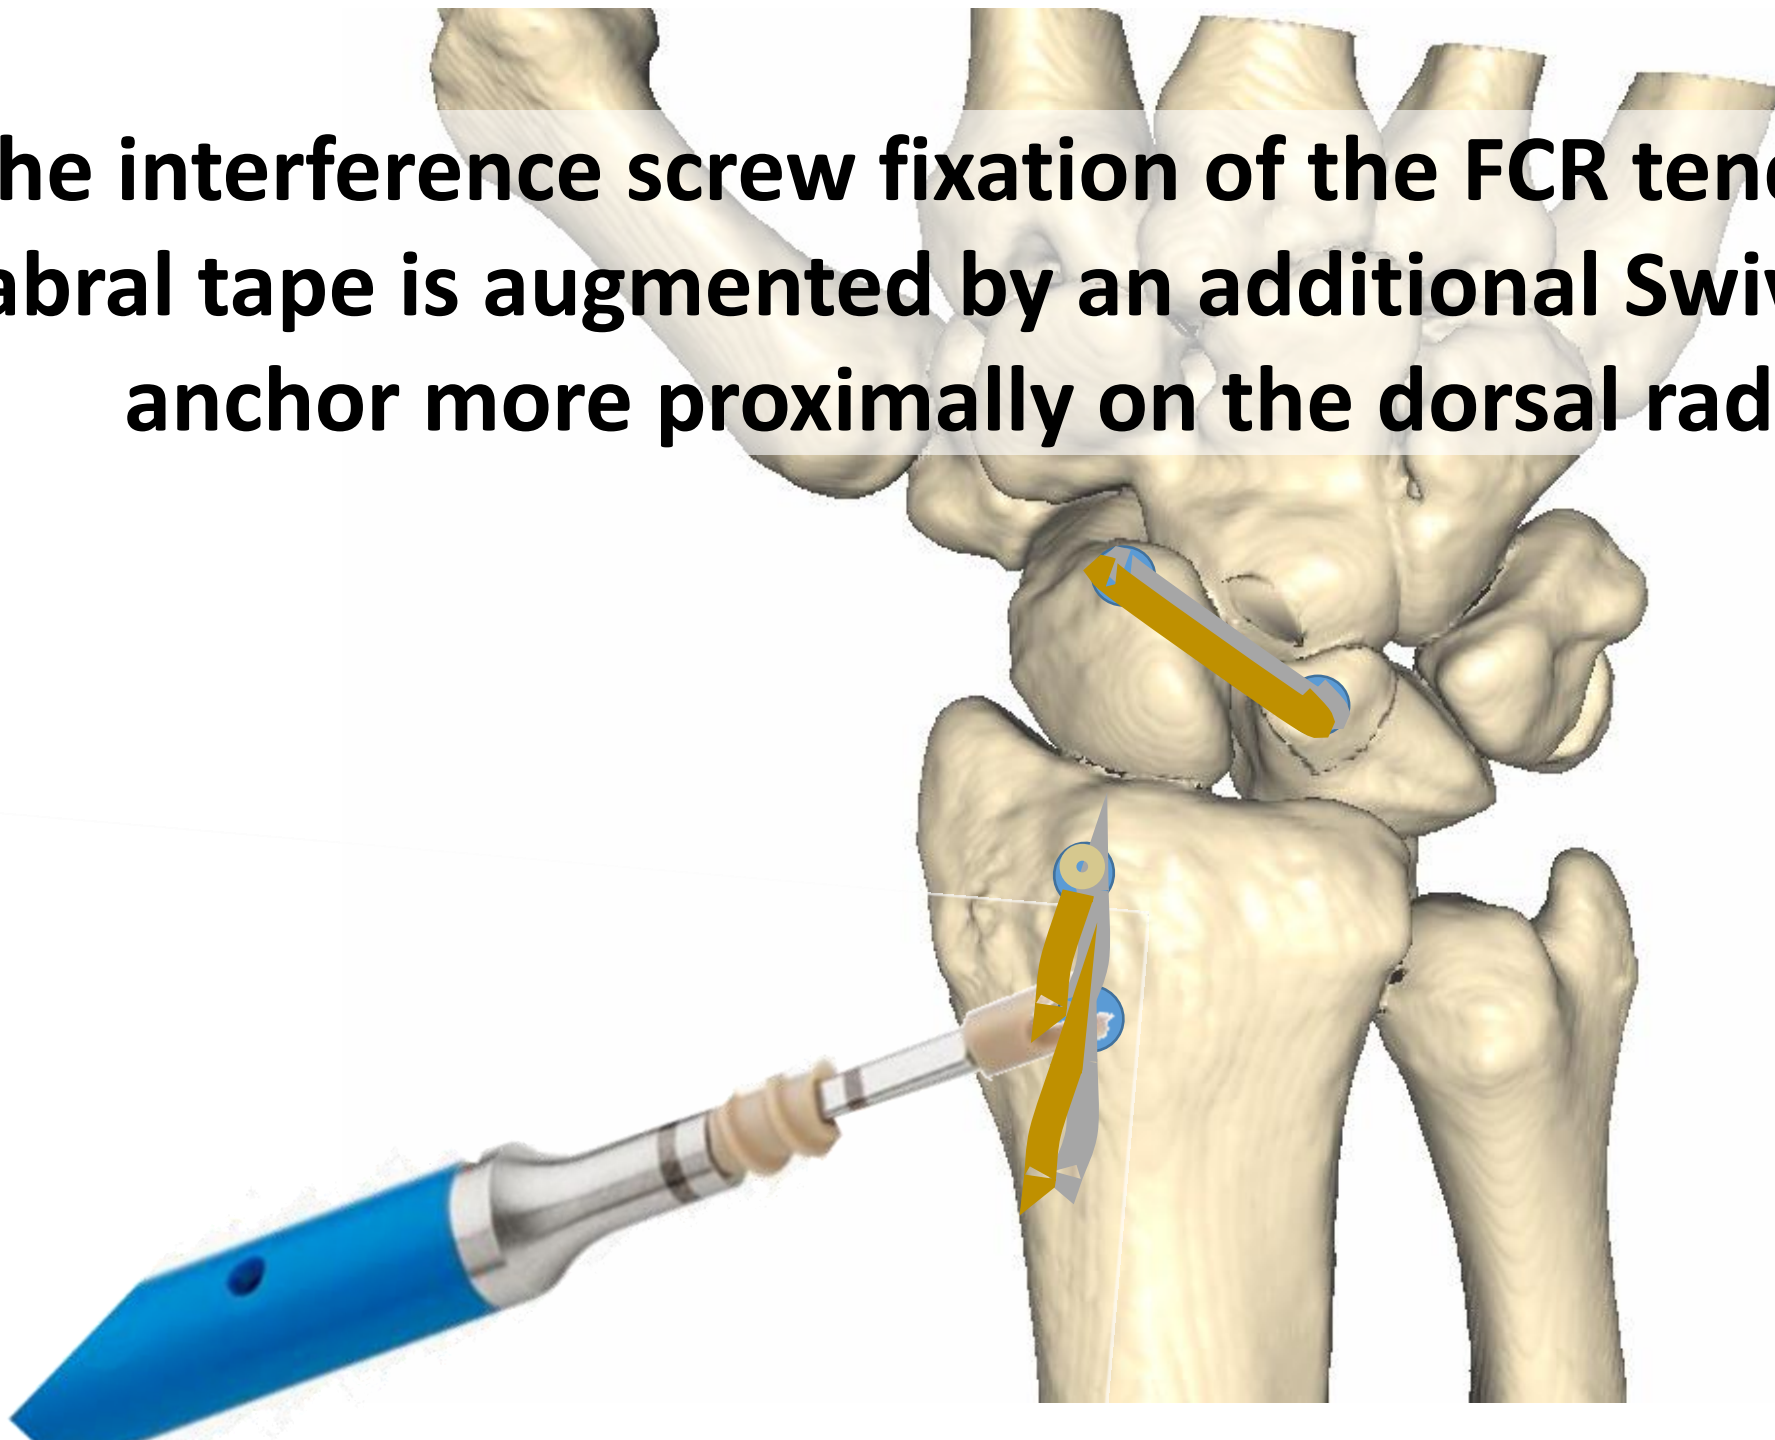

**Add an additional suture to local tissue, or in larger patients, a small interference screw, to secure the FCR/labral tape to the dorsal lunate to prevent in-line slippage.**

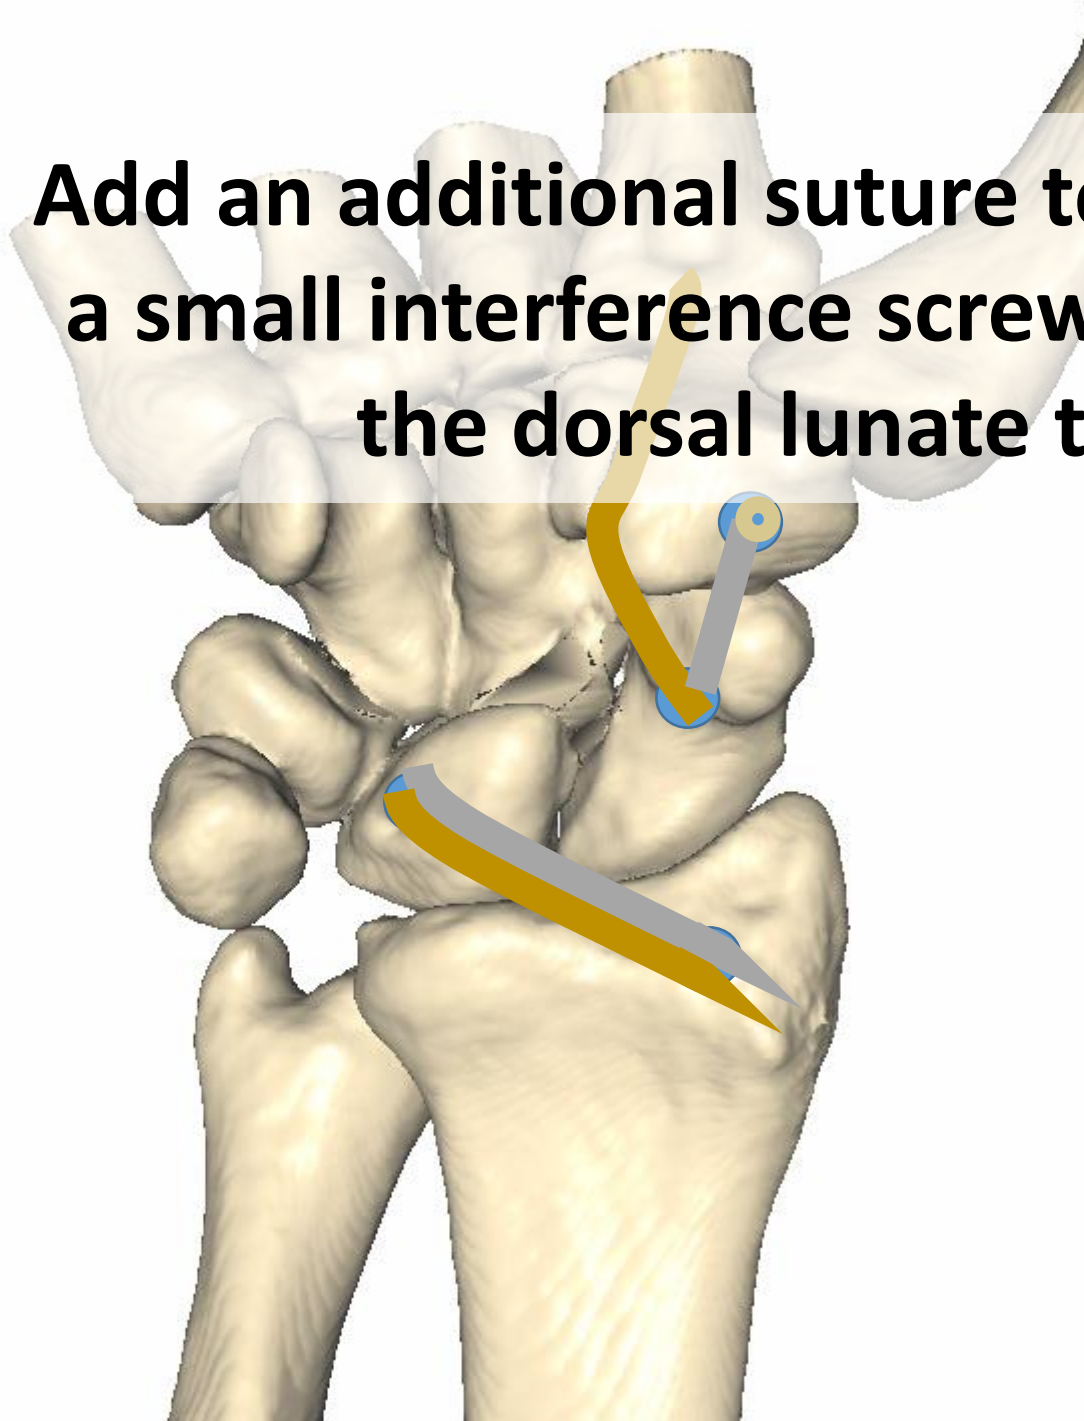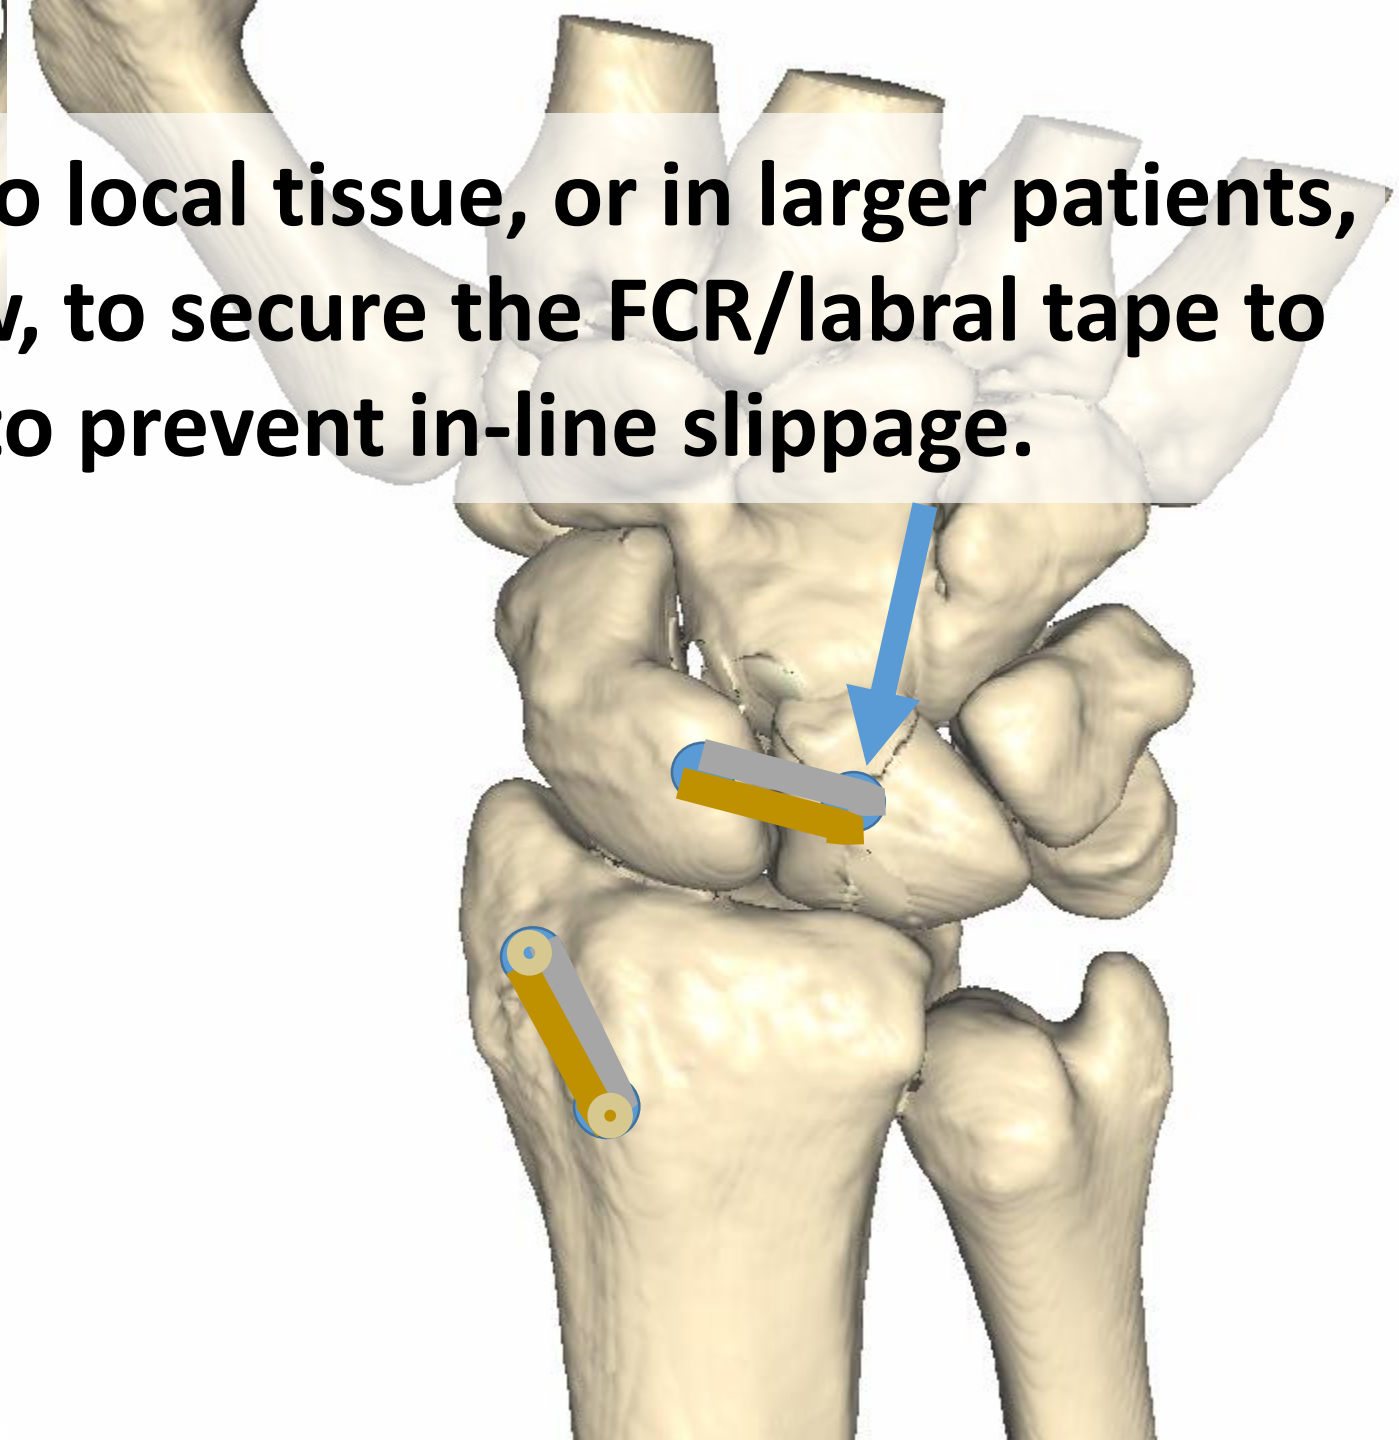



# **“ANAFAB” – Anatomical Front And Back reconstruction**

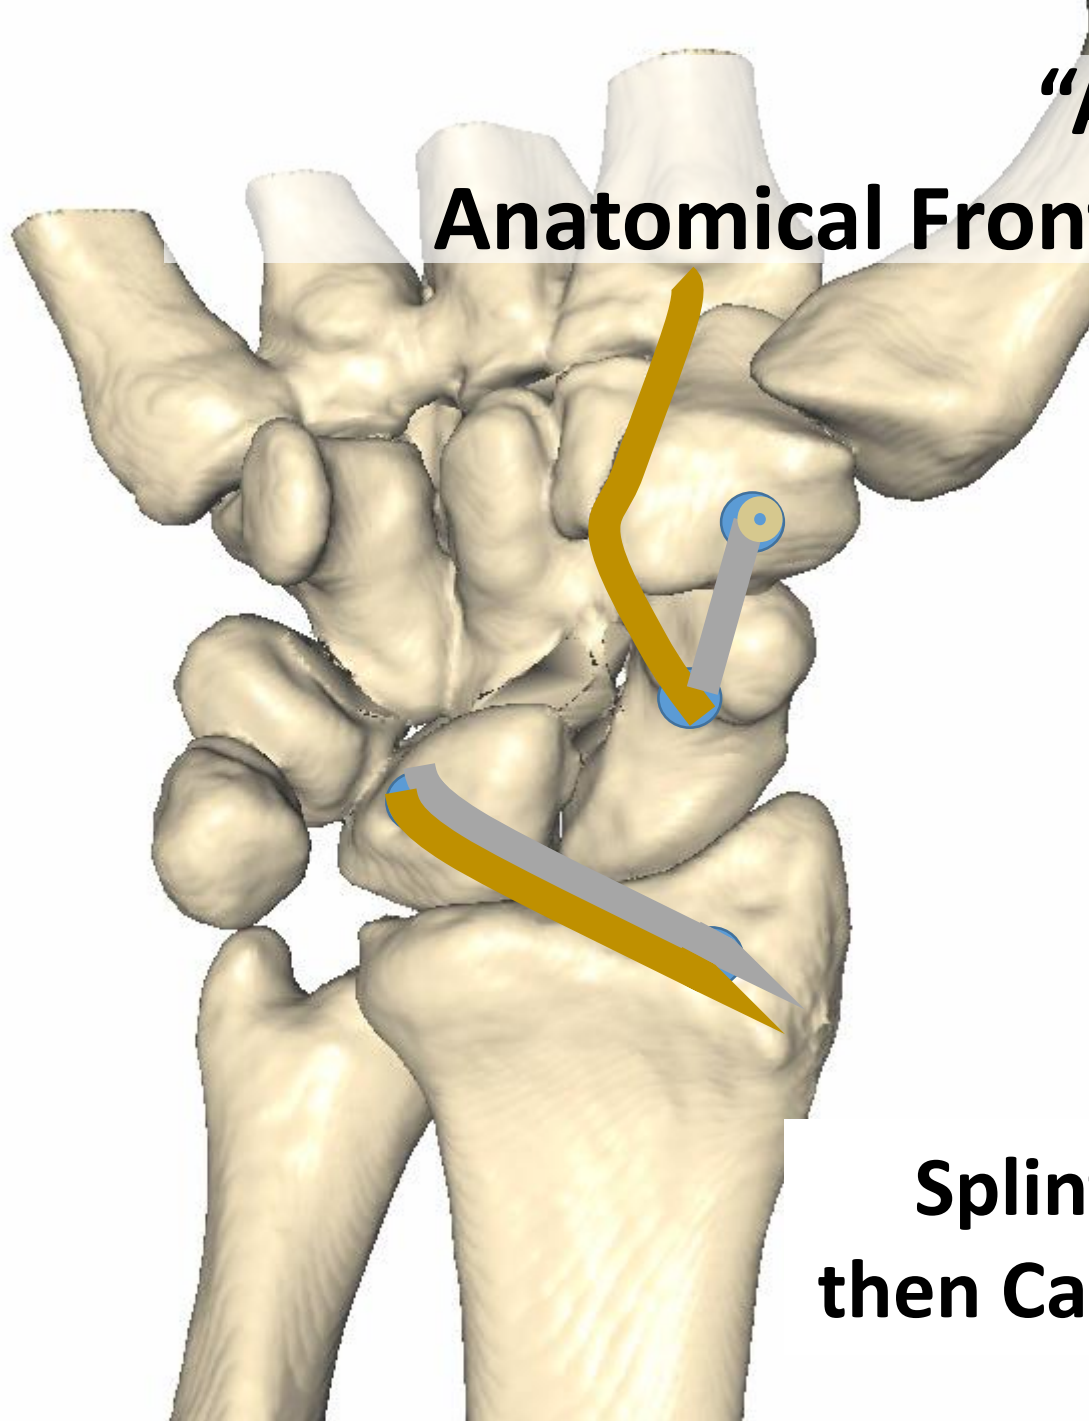

**Splint 5 days  
then Cast 6 weeks**

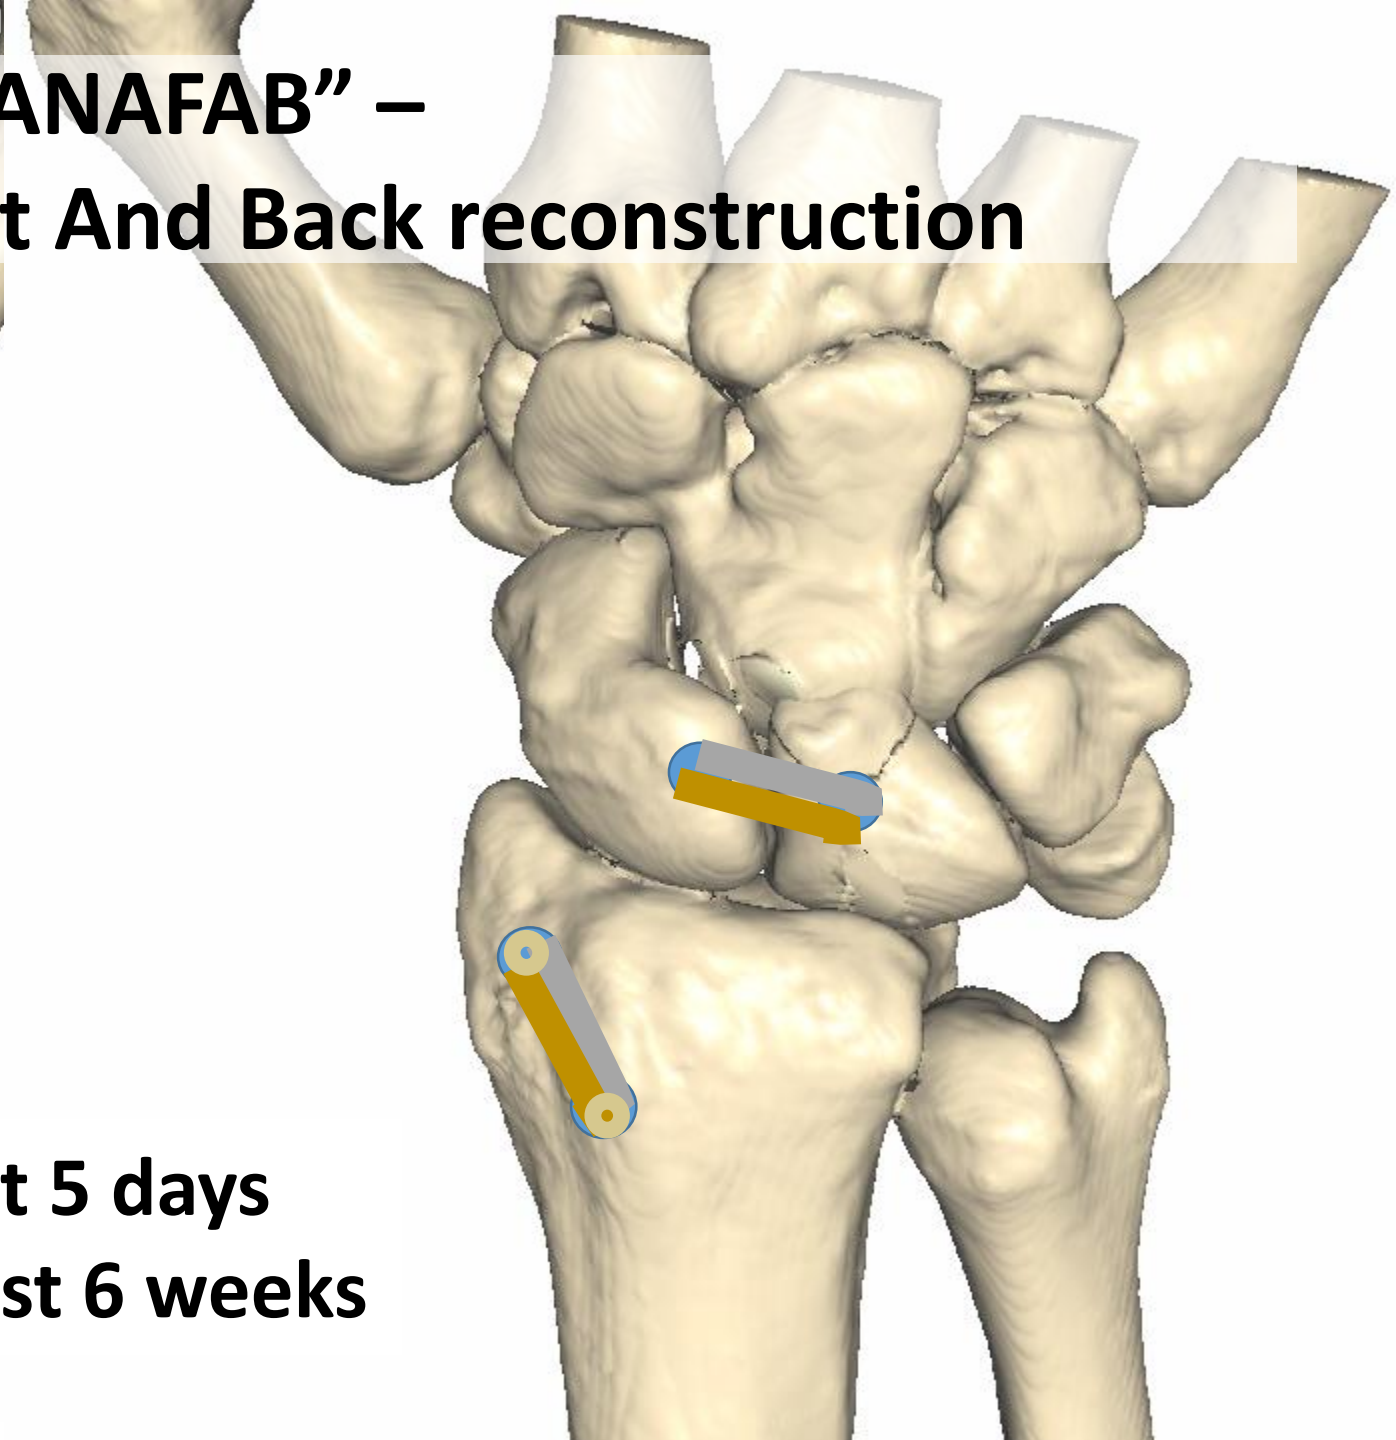



# **“ANAFAB” – Anatomical Front And Back reconstruction**

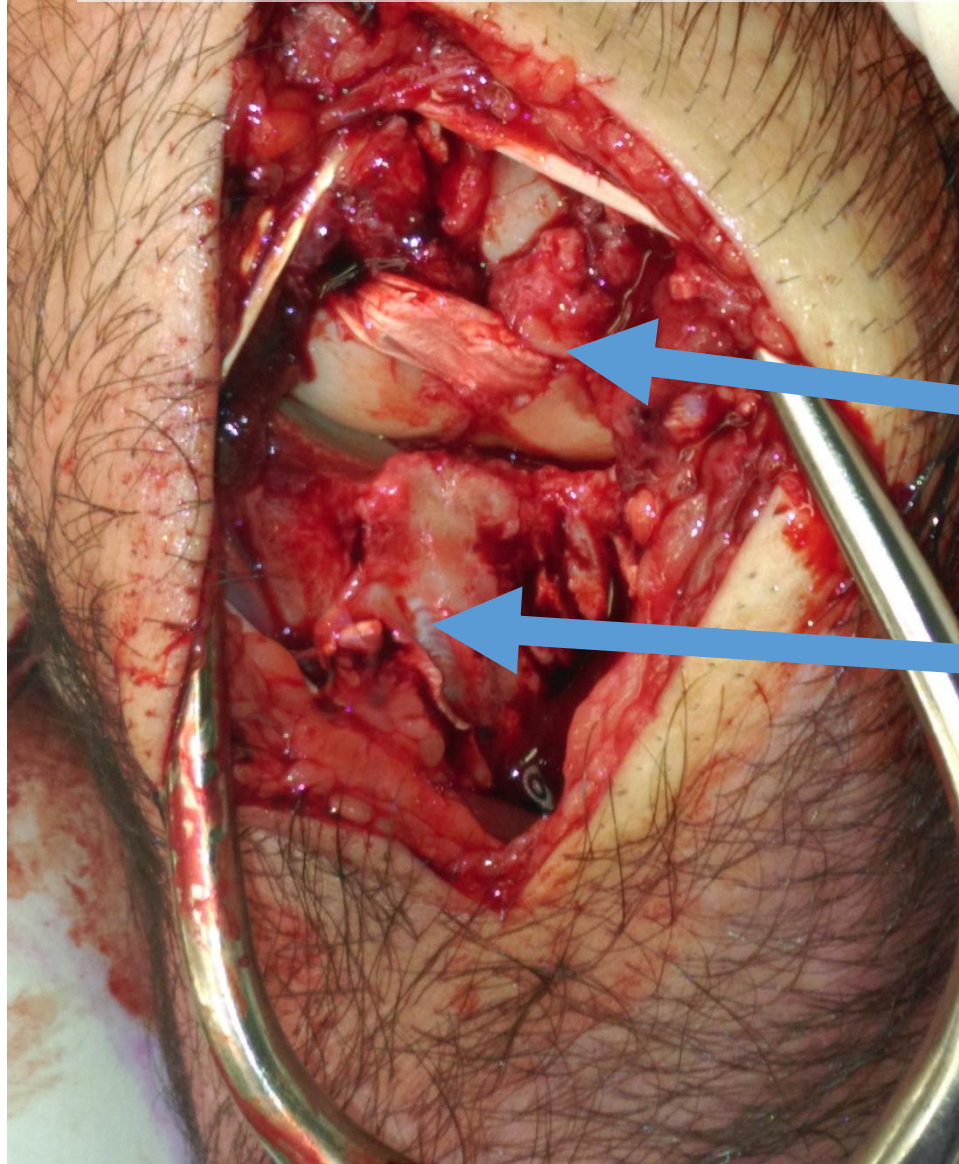

**Splint 5 days  
then Cast 6 weeks**

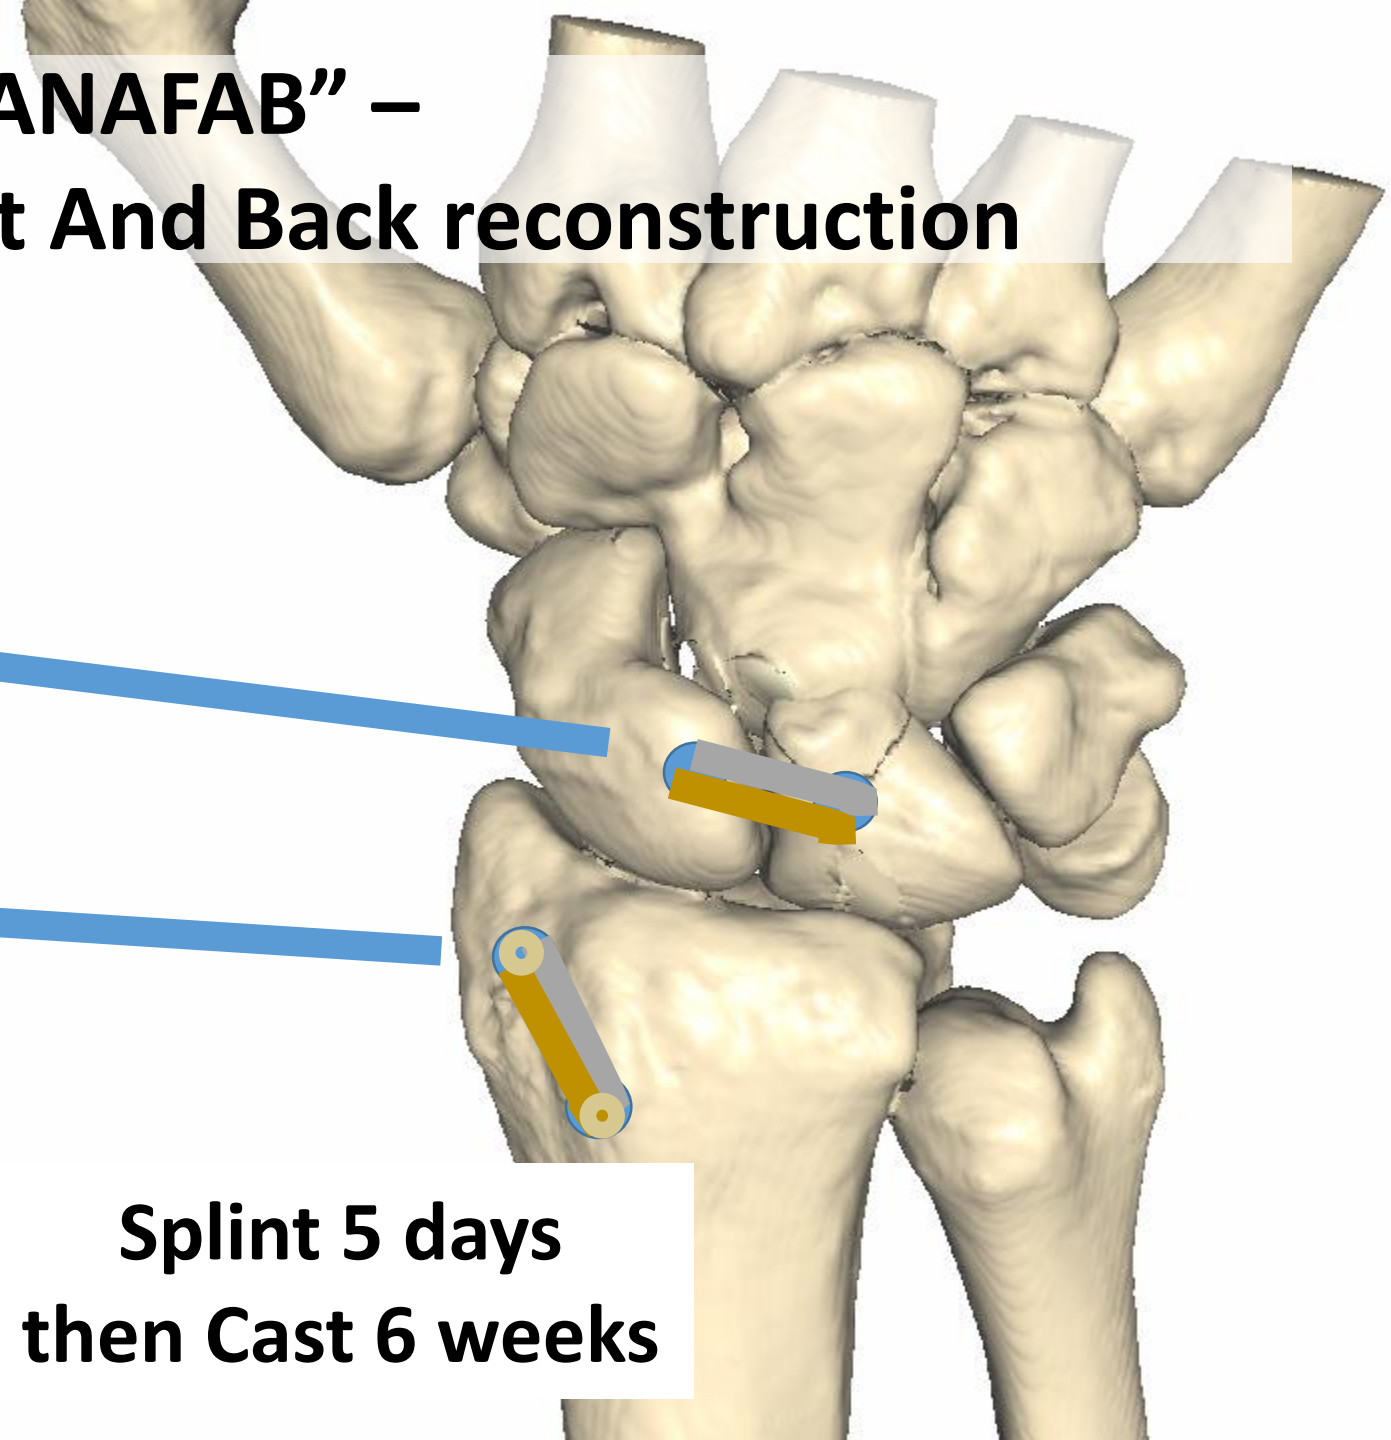

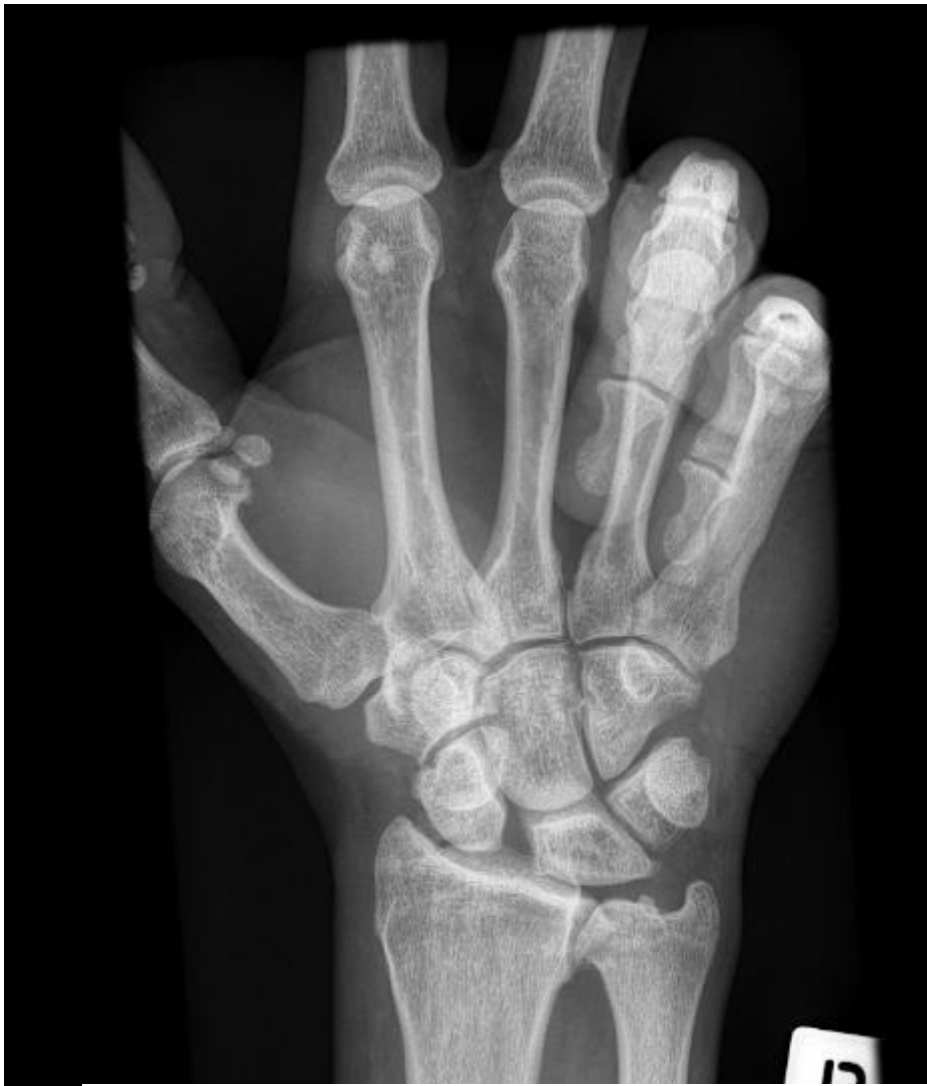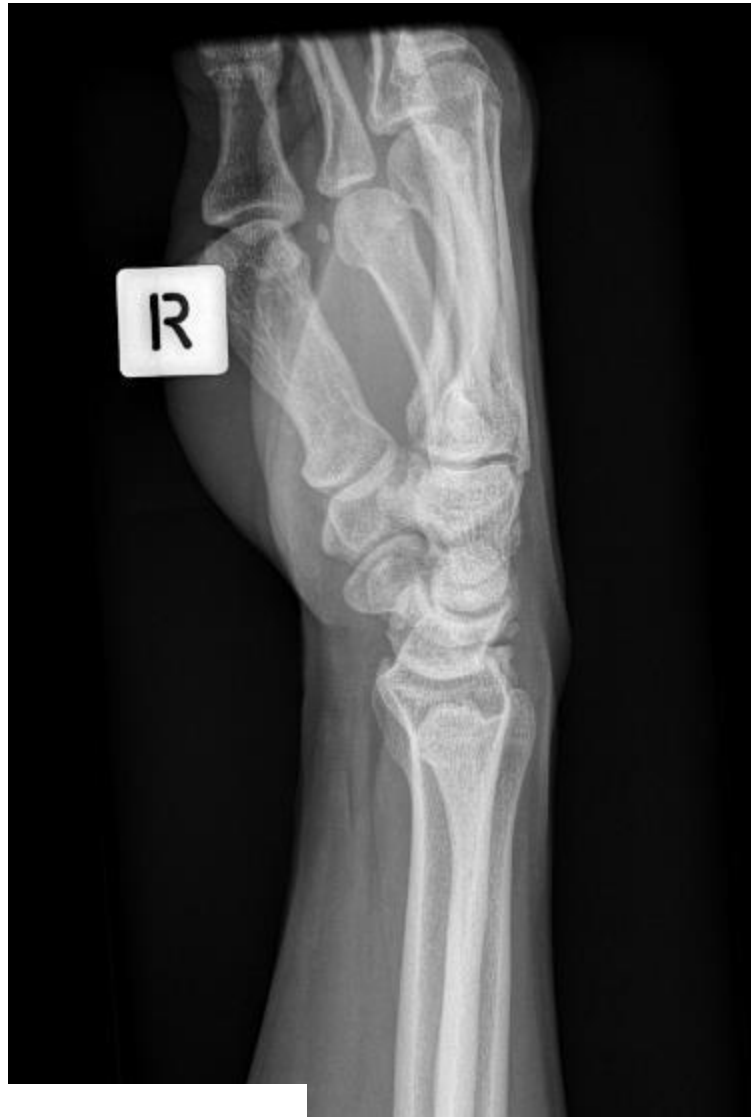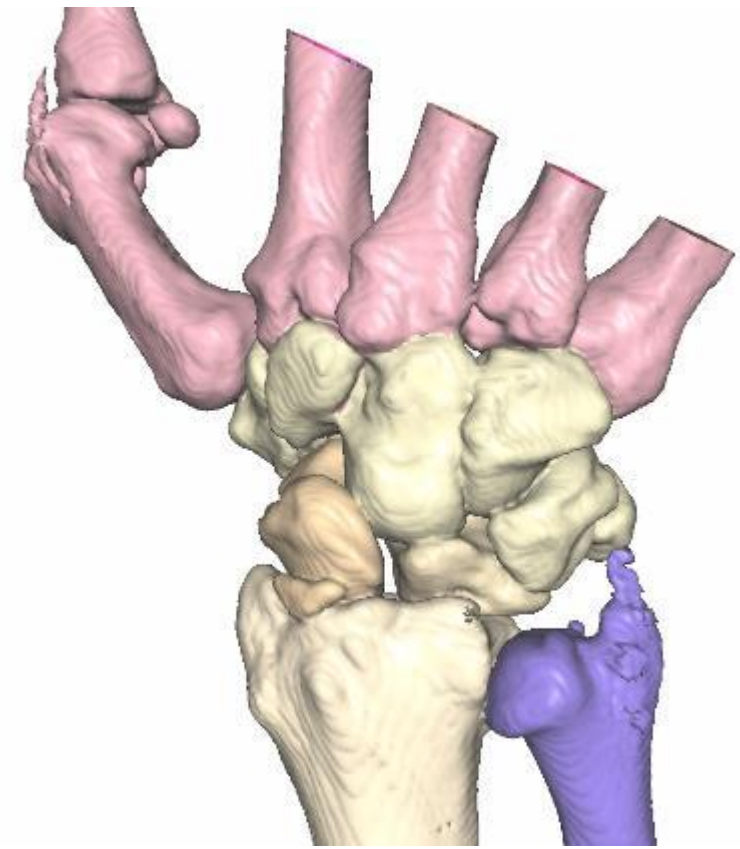

**32 y.o. male**  
**heavy FOOSH at football**

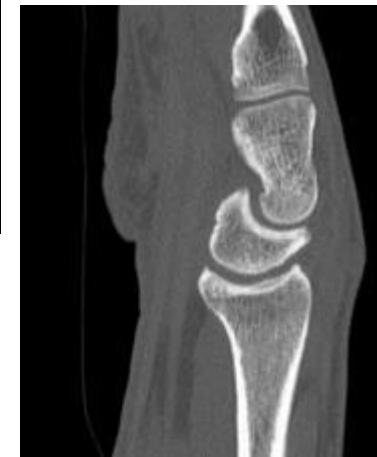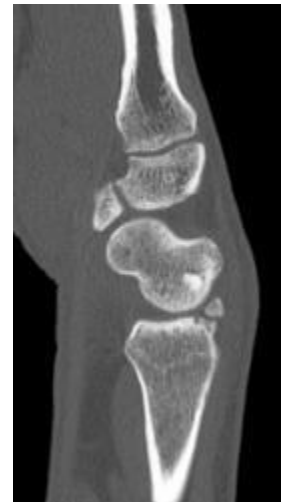



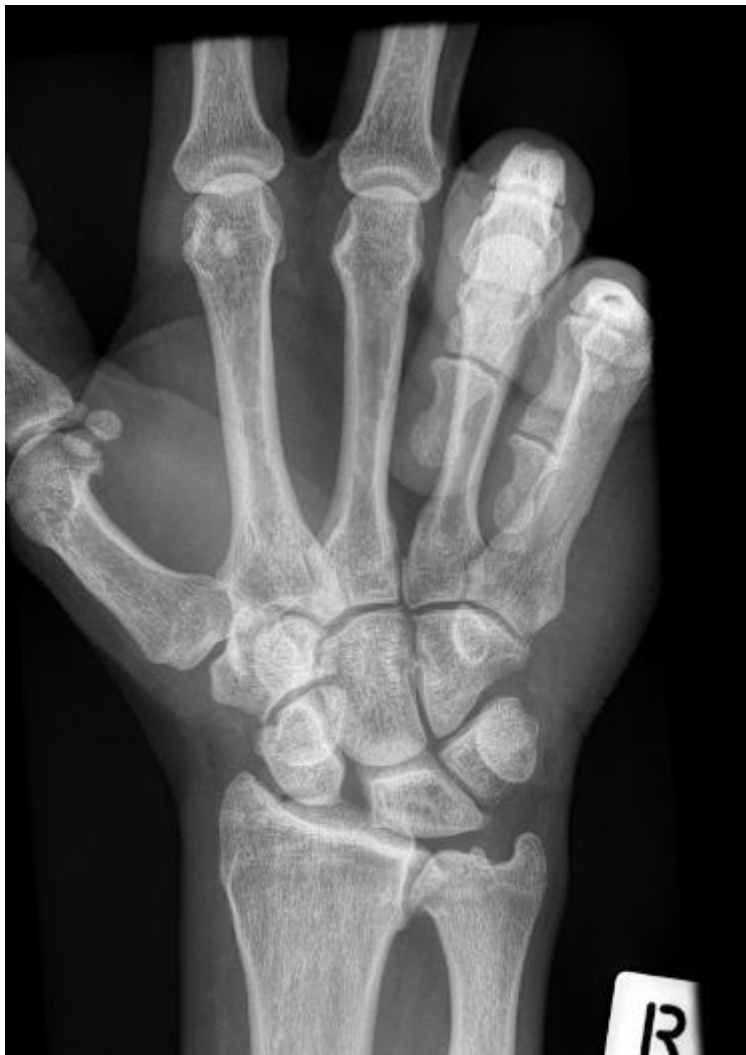

**Pre-repair**

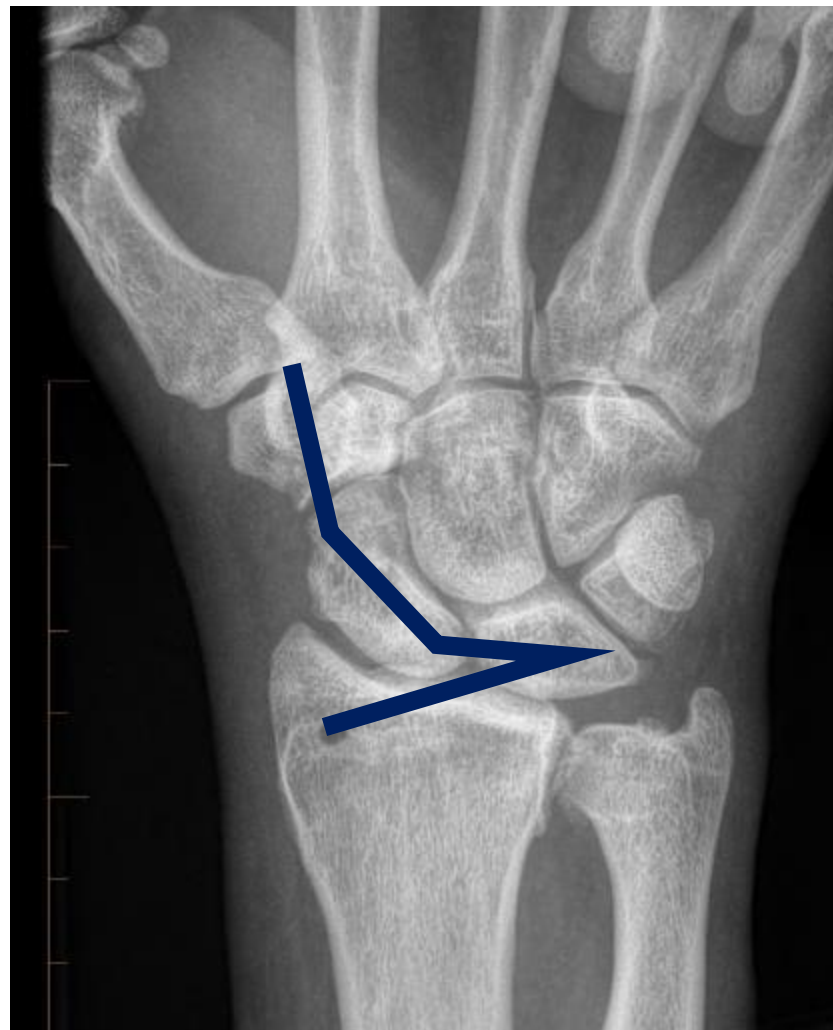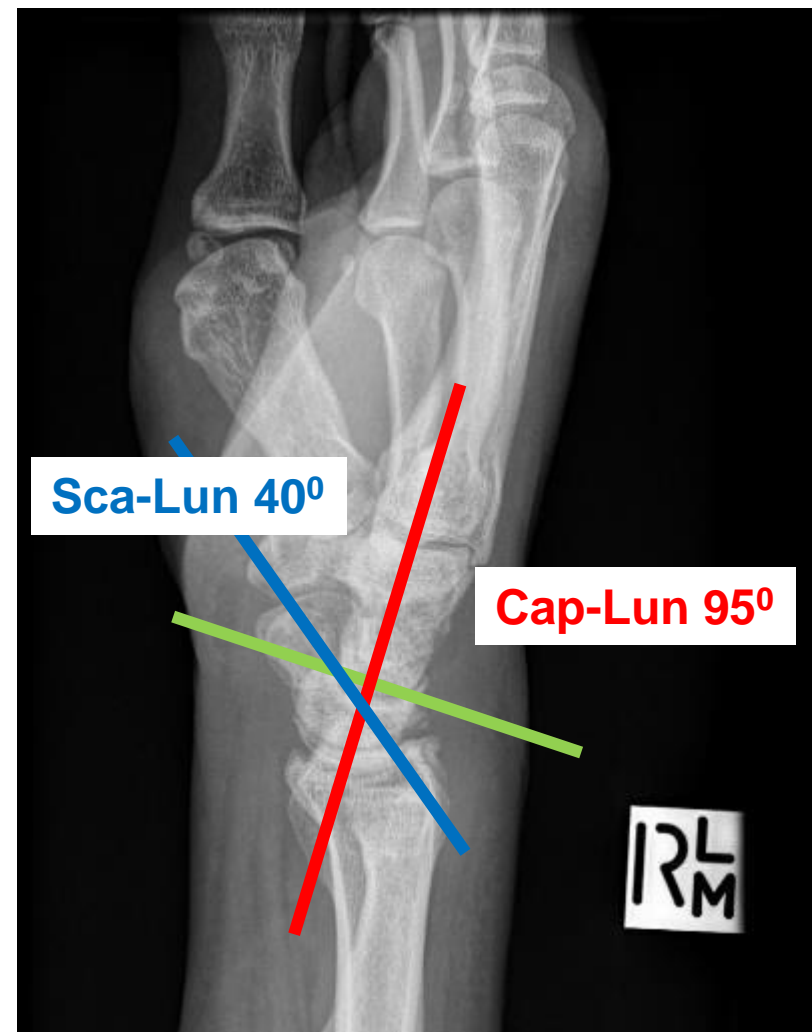

**3 months Post repair**

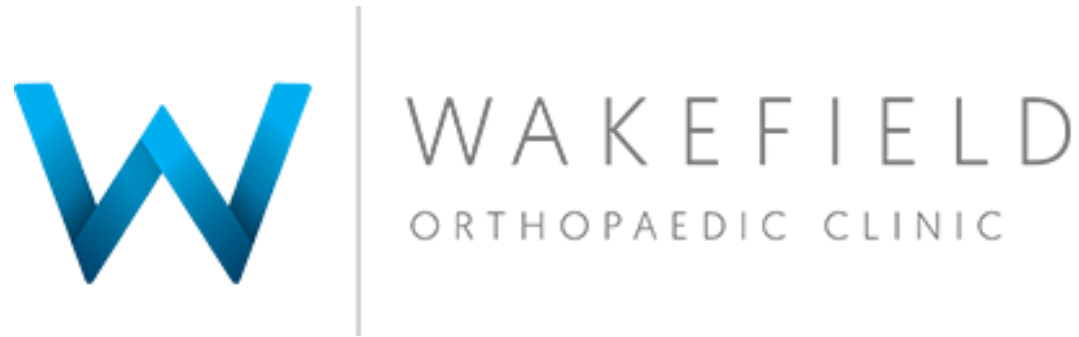

**msandow@woc.com.au**

***Swivel Lock™, QuickPass™ and Labral Tape™ are Trade Marked and registered devices from Arthrex. Arthrex have had no part in the development of this technique, nor supplied any funding or support.***
